# Supplementary material for: Inhibition of [FeFe]-hydrogenase by formaldehyde: proposed mechanism and reactivity of FeFe alkyl complexes
Source: Royal Society of Chemistry journal article supplement (doi:10.1039/d1sc05803g), 2021-01-01
Supplement: d1sc05803g1.pdf [file d1sc05803g1.pdf]

*Supporting Information*

**Inhibition of [FeFe]-Hydrogenase by Formaldehyde:  
Proposed Mechanism and Reactivity of FeFe Alkyl  
Complexes**

FanJun Zhang,\* Toby J. Woods, Lingyang Zhu and Thomas B. Rauchfuss\*  
School of Chemical Sciences  
University of Illinois  
Urbana, IL 61801, USA

## Table of Contents

|                                                                                                                                                                                                                        |            |
|------------------------------------------------------------------------------------------------------------------------------------------------------------------------------------------------------------------------|------------|
| <b>Spectra for <math>[\text{Fe}_2[(\text{SCH}_2)_2\text{NCH}_2](\text{CO})_4(\text{PMe}_3)_2]\text{BF}_4</math> (<math>[\mathbf{2}]\text{BF}_4</math>) and (<math>[\mathbf{2}]\text{BAr}^{\text{F}_4}</math>).....</b> | <b>S3</b>  |
| <b>Exchange Process in <math>[\mathbf{2}]\text{BAr}^{\text{F}_4}</math> Determined by Spin Saturation Transfer .....</b>                                                                                               | <b>S15</b> |
| <b>Mechanistic Studies for Formation of <math>[\mathbf{2}]^+</math> .....</b>                                                                                                                                          | <b>S20</b> |
| 1. Spectra for $[\text{Fe}_2[(\text{SCH}_2)_2\text{NH}_2](\text{CO})_4(\text{PMe}_3)_2]\text{BF}_4$ ( $[\mathbf{1H}]\text{BF}_4$ ).....                                                                                | S20        |
| 2. Spectra for $[\text{HFe}_2[(\text{SCH}_2)_2\text{NH}](\text{CO})_4(\text{PMe}_3)_2]\text{BAr}^{\text{F}_4}$ ( $[\mathbf{H1}]\text{BAr}^{\text{F}_4}$ ).....                                                         | S23        |
| 3. Reaction of $[\text{Fe}_2[(\text{SCH}_2)_2\text{NH}](\text{CO})_4(\text{PMe}_3)_2]$ ( $\mathbf{1}$ ) or $[\mathbf{H1}]\text{BAr}^{\text{F}_4}$ with $\text{CH}_2\text{O}$ .....                                     | S26        |
| 4. IR for the reaction of $\mathbf{1} + \text{PhCHO} + \text{HBF}_4$ .....                                                                                                                                             | S31        |
| 5. Detection of the $\text{CH}_2$ exchange in $[\mathbf{2}]\text{BAr}^{\text{F}_4}$ by $^{13}\text{C}$ NMR .....                                                                                                       | S32        |
| <b>Spectra for <math>\text{Et}_4\text{N}[\text{Fe}_2[(\text{SCH}_2)_2\text{NCH}_2\text{CN}](\text{CN})(\text{CO})_4\text{PPh}_3]</math> (<math>\text{Et}_4\text{N}[\mathbf{5}]</math>).....</b>                        | <b>S34</b> |
| <b>Mechanistic Studies for Formation of <math>\text{Et}_4\text{N}[\mathbf{5}]</math> .....</b>                                                                                                                         | <b>S42</b> |
| <b>Spectra for <math>[\text{Fe}_2[(\text{SCH}_2)_2\text{NCH}_2\text{PPh}_3](\text{CO})_4(\text{PMe}_3)_2]^+</math> (<math>[\mathbf{6}]^+</math>) .....</b>                                                             | <b>S45</b> |
| <b>Spectra for <math>\text{Fe}_2[(\text{SCH}_2)_2\text{NMe}](\text{CO})_4(\text{PMe}_3)_2</math>.....</b>                                                                                                              | <b>S51</b> |
| <b>Crystal Data and Structure Refinements.....</b>                                                                                                                                                                     | <b>S55</b> |
| <b>Crystallography.....</b>                                                                                                                                                                                            | <b>S57</b> |

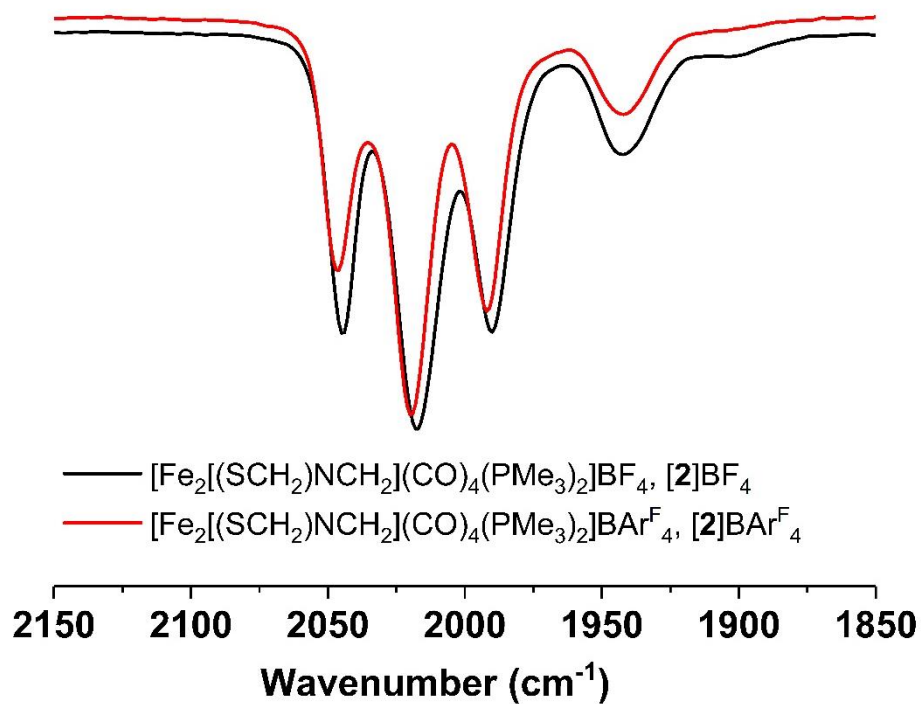

**Figure S1.** IR spectra of [Fe<sub>2</sub>(SCH<sub>2</sub>)<sub>2</sub>NCH<sub>2</sub>(CO)<sub>4</sub>(PMe<sub>3</sub>)<sub>2</sub>]BF<sub>4</sub> ([2]BF<sub>4</sub>) and [Fe<sub>2</sub>(SCH<sub>2</sub>)<sub>2</sub>NCH<sub>2</sub>(CO)<sub>4</sub>(PMe<sub>3</sub>)<sub>2</sub>]BARF<sub>4</sub> ([2]BARF<sub>4</sub>) in CH<sub>2</sub>Cl<sub>2</sub> solution.

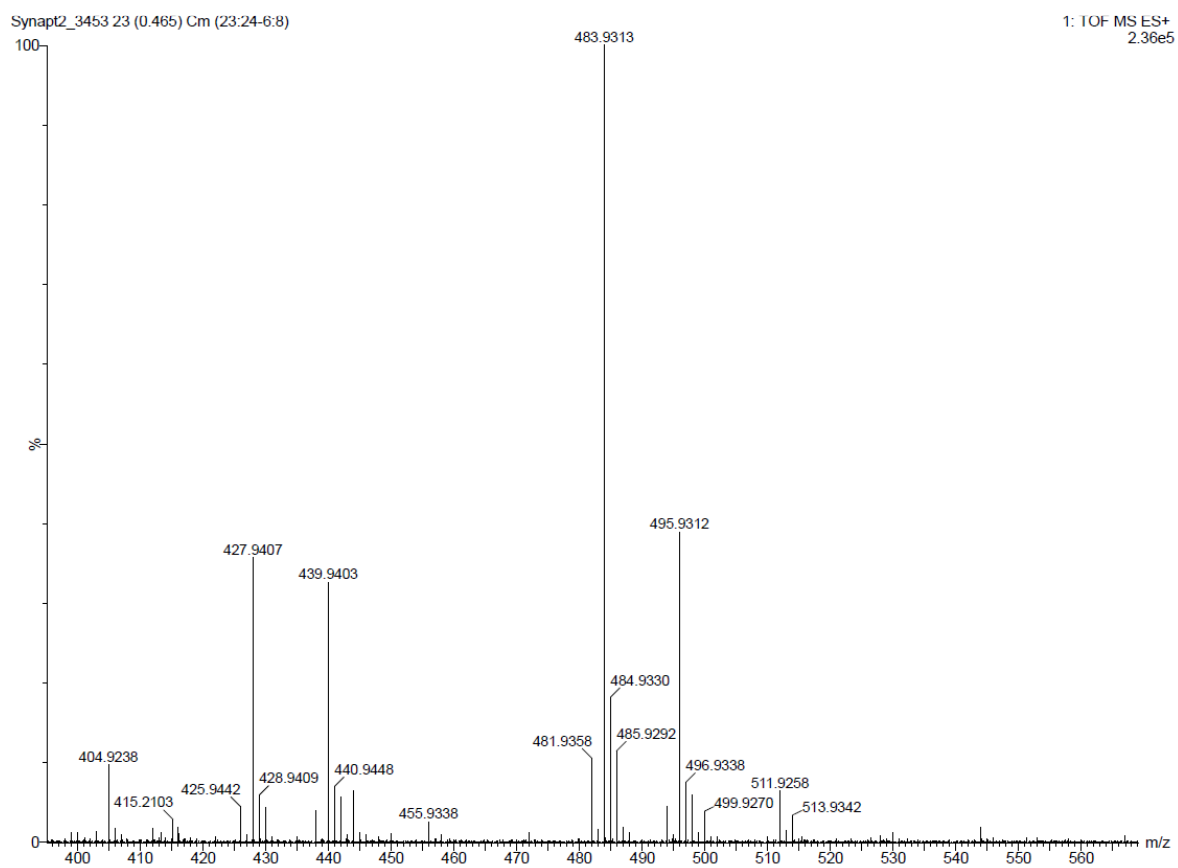

**Figure S2.** HR-MS (ESI) spectrum of  $[\text{Fe}_2((\text{SCH}_2)_2\text{NCH}_2)(\text{CO})_4(\text{PMe}_3)_2]\text{BF}_4$  ( $[\mathbf{2}]\text{BF}_4$ ) in  $\text{CH}_2\text{Cl}_2$  solution.

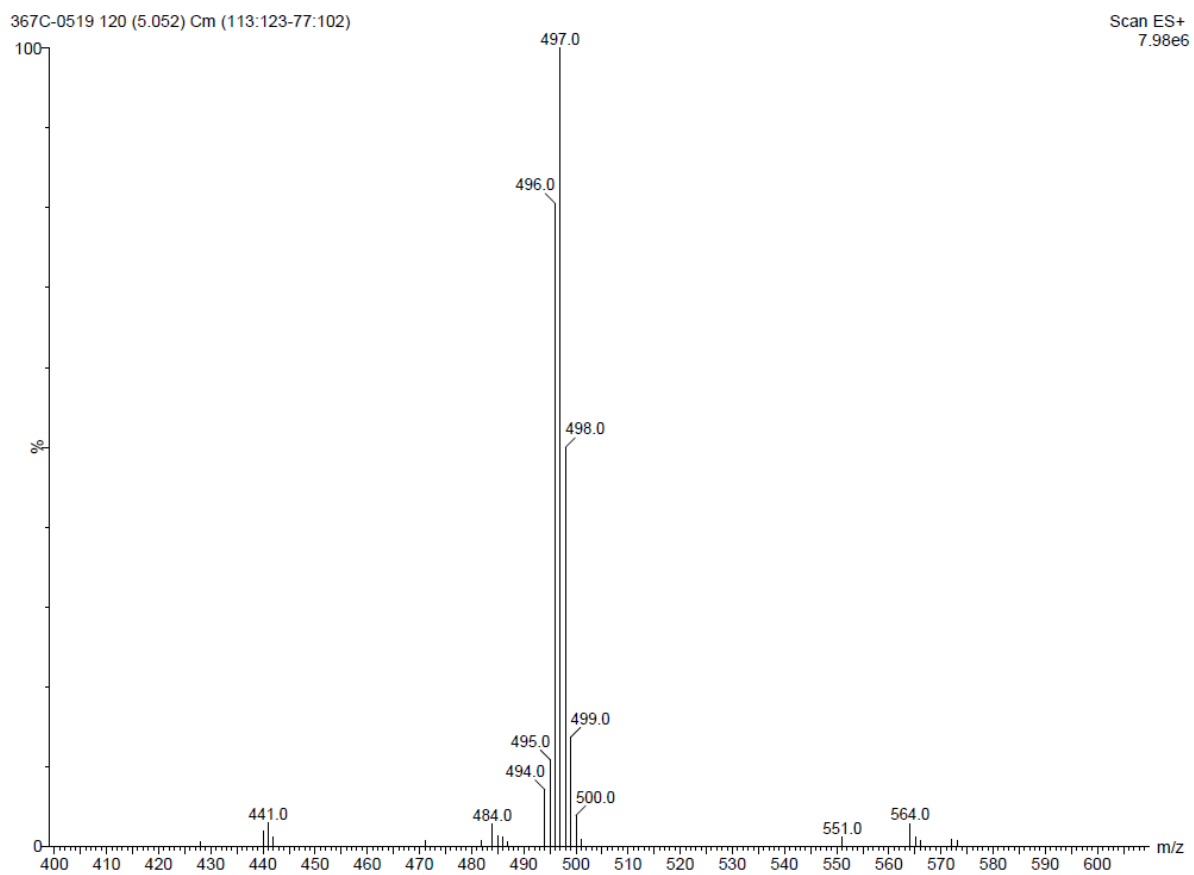

**Figure S3.** ESI-MS spectrum of  $^{13}\text{C}$  labeled  $[\text{Fe}_2[(\text{SCH}_2)_2\text{NCH}_2](\text{CO})_4(\text{PMe}_3)_2]\text{BF}_4$  (**[2]** $\text{BF}_4$ ) in  $\text{CH}_2\text{Cl}_2$  solution.

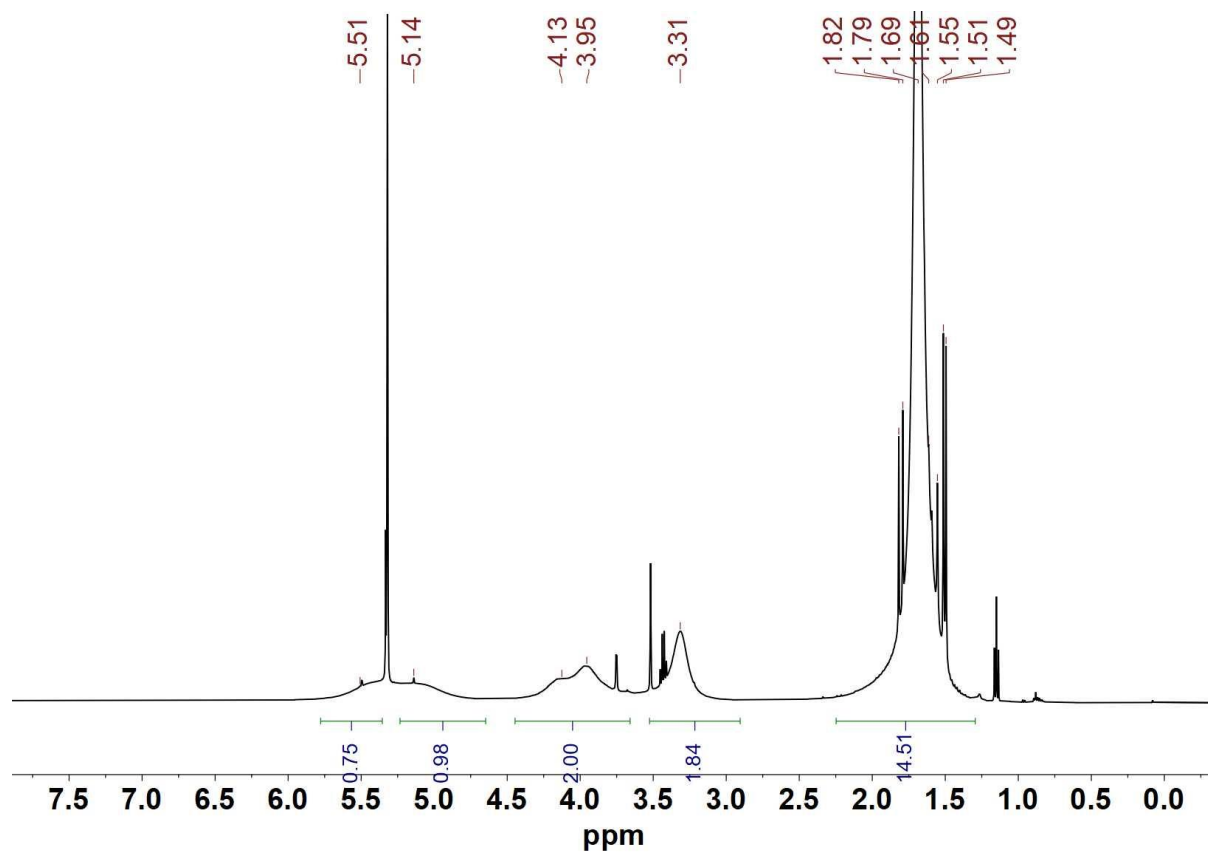

**Figure S4.**  $^1\text{H}$  NMR spectrum of  $[\text{Fe}_2((\text{SCH}_2)_2\text{NCH}_2)(\text{CO})_4(\text{PMe}_3)_2]\text{BF}_4$  (**[2]** $\text{BF}_4$ ) in  $\text{CD}_2\text{Cl}_2$  at room temperature.

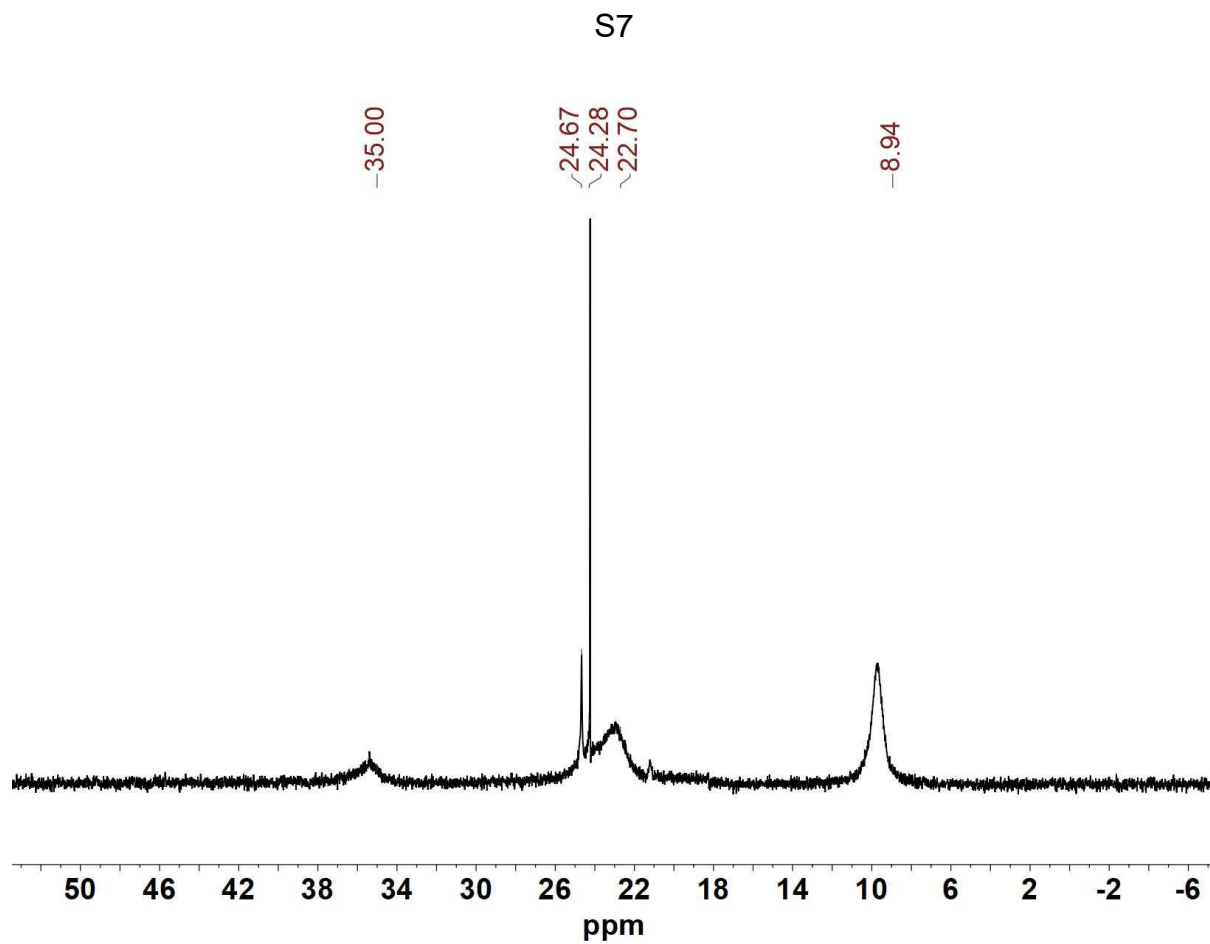

**Figure S5.**  $^{31}\text{P}$  NMR spectrum of  $[\text{Fe}_2[(\text{SCH}_2)_2\text{NCH}_2](\text{CO})_4(\text{PMe}_3)_2]\text{BF}_4$  (**[2]BF<sub>4</sub>**) in  $\text{CD}_2\text{Cl}_2$  at room temperature.

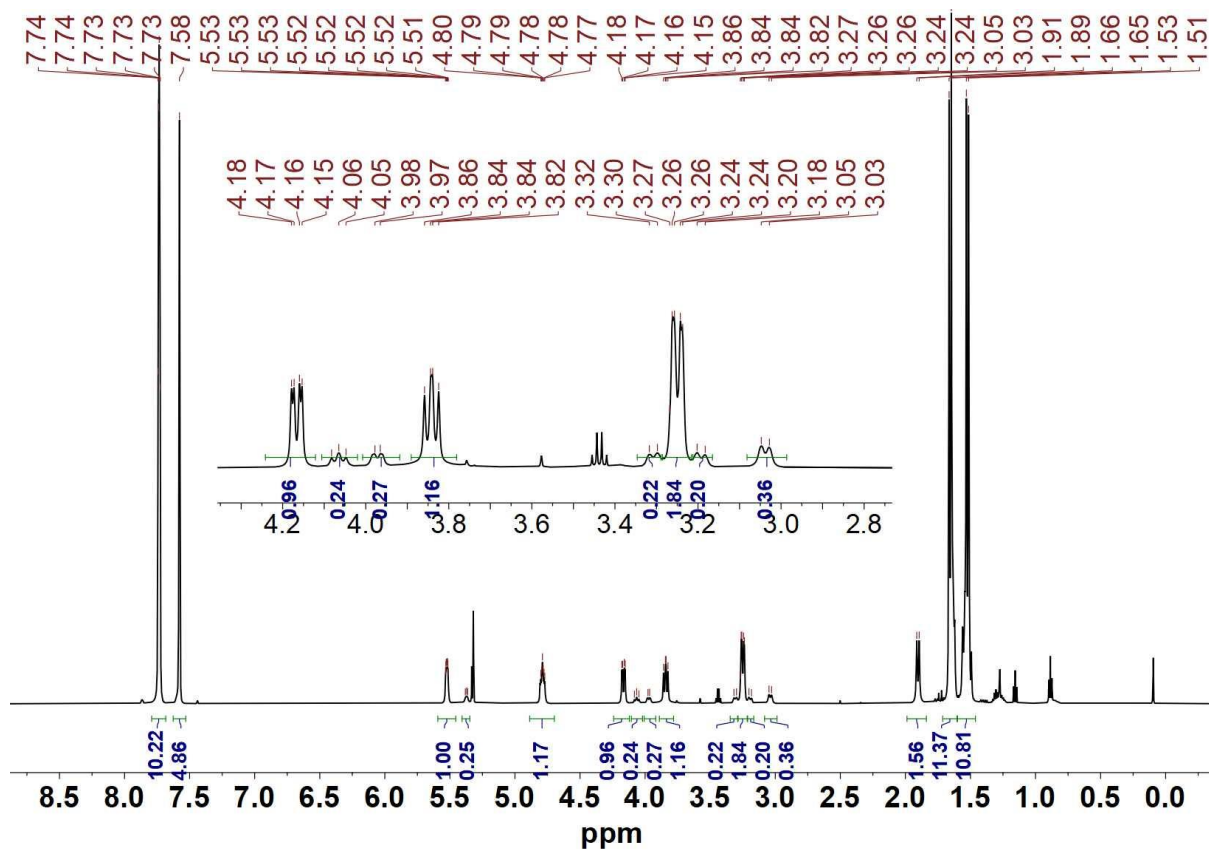

**Figure S6.**  $^1\text{H}$  NMR spectrum of  $[\text{Fe}_2((\text{SCH}_2)_2\text{NCH}_2)(\text{CO})_4(\text{PMe}_3)_2]\text{BAr}^{\text{F}}_4$  ( $[\mathbf{2}]\text{BAr}^{\text{F}}_4$ ) in  $\text{CD}_2\text{Cl}_2$  at room temperature.



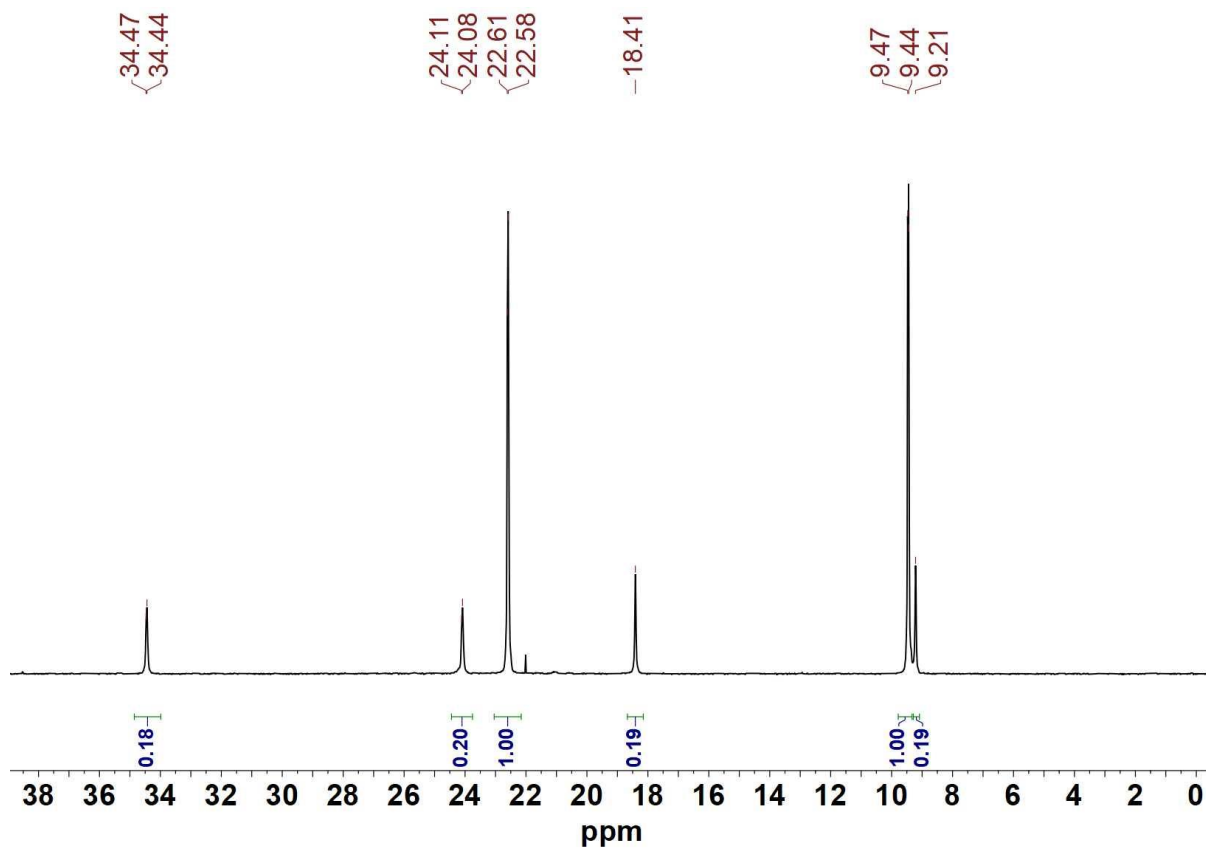

**Figure S7.**  $^{31}\text{P}$  NMR spectrum of  $[\text{Fe}_2[(\text{SCH}_2)_2\text{NCH}_2](\text{CO})_4(\text{PMe}_3)_2]\text{BAr}^{\text{F}}_4$  ( $[\mathbf{2}]\text{BAr}^{\text{F}}_4$ ) in  $\text{CD}_2\text{Cl}_2$  at room temperature.

Three isomers were detected and assigned as follows:

$\delta$  22.59 (d,  $J_{\text{PP}} = 7.3$  Hz), 9.45 (d,  $J_{\text{PP}} = 7.4$  Hz), *trans*-dibasal; 34.46 (d,  $J_{\text{PP}} = 7.7$  Hz), 24.10 (d,  $J_{\text{PP}} = 7.6$  Hz), *cis*-dibasal; 18.41 (s), 9.21 (s), apical-basal.

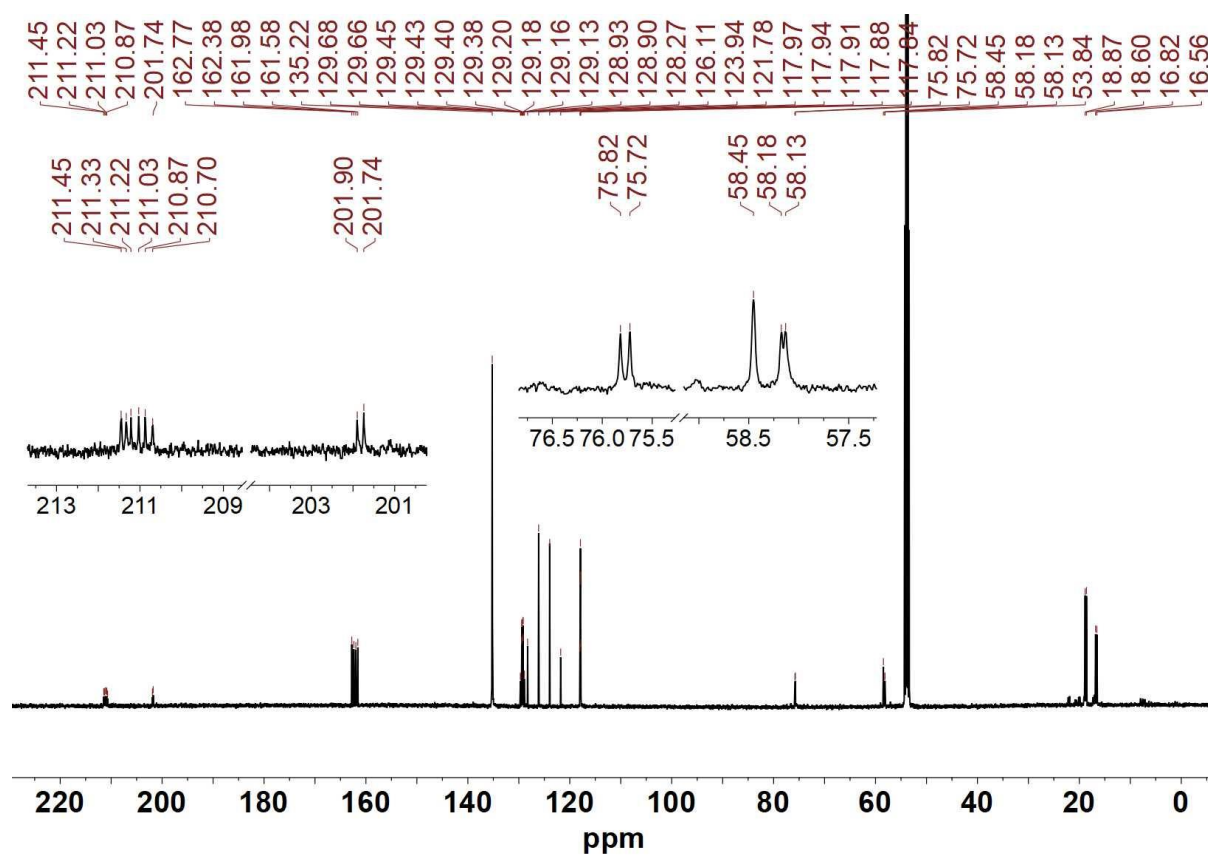

**Figure S8.**  $^{13}\text{C}$  NMR spectrum of  $[\text{Fe}_2[(\text{SCH}_2)_2\text{NCH}_2](\text{CO})_4(\text{PMe}_3)_2]\text{BAr}^{\text{F}}_4$  ( $[\mathbf{2}]\text{BAr}^{\text{F}}_4$ ) in  $\text{CD}_2\text{Cl}_2$  at room temperature.

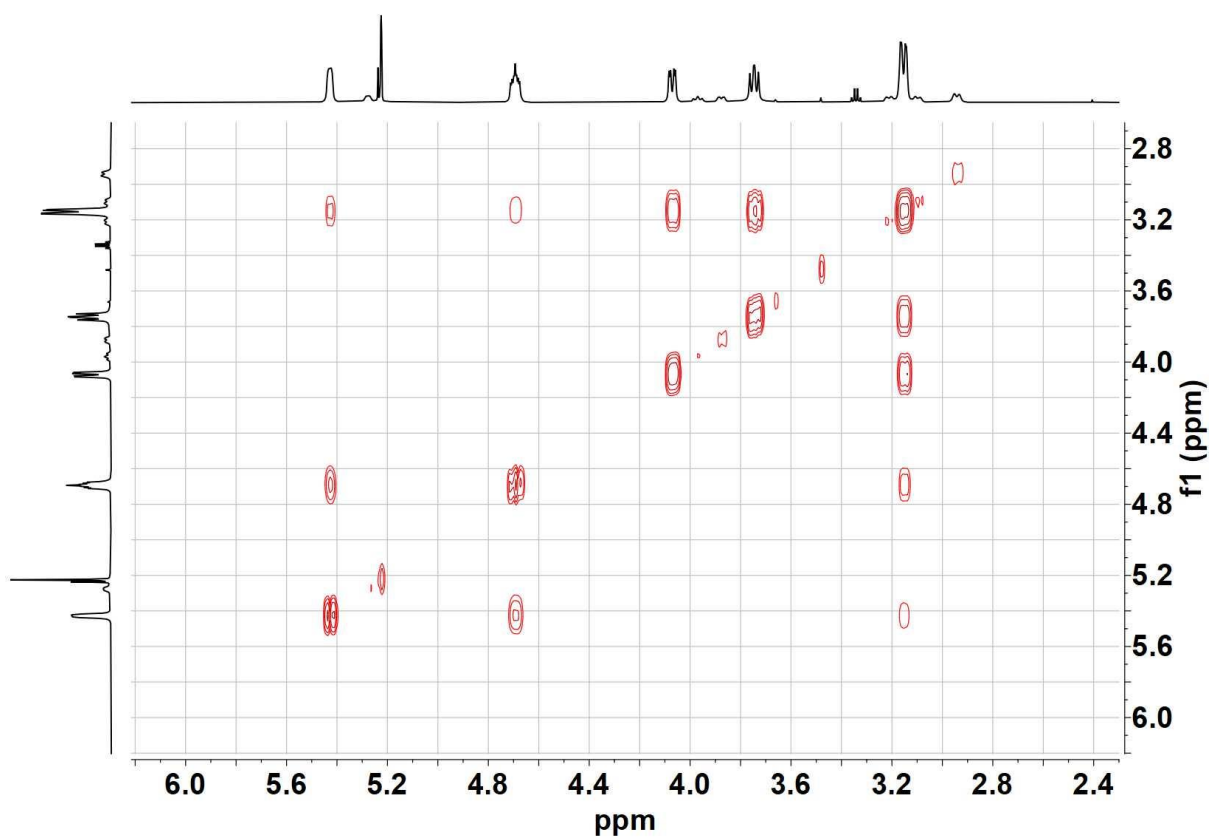

**Figure S9.** 2D-COSY NMR spectrum ( $\text{CH}_2$  region) of  $[\text{Fe}_2[(\text{SCH}_2)_2\text{NCH}_2](\text{CO})_4(\text{PMe}_3)_2]\text{BARF}_4$  ( $[\mathbf{2}]\text{BARF}_4$ ) in  $\text{CD}_2\text{Cl}_2$  at room temperature.

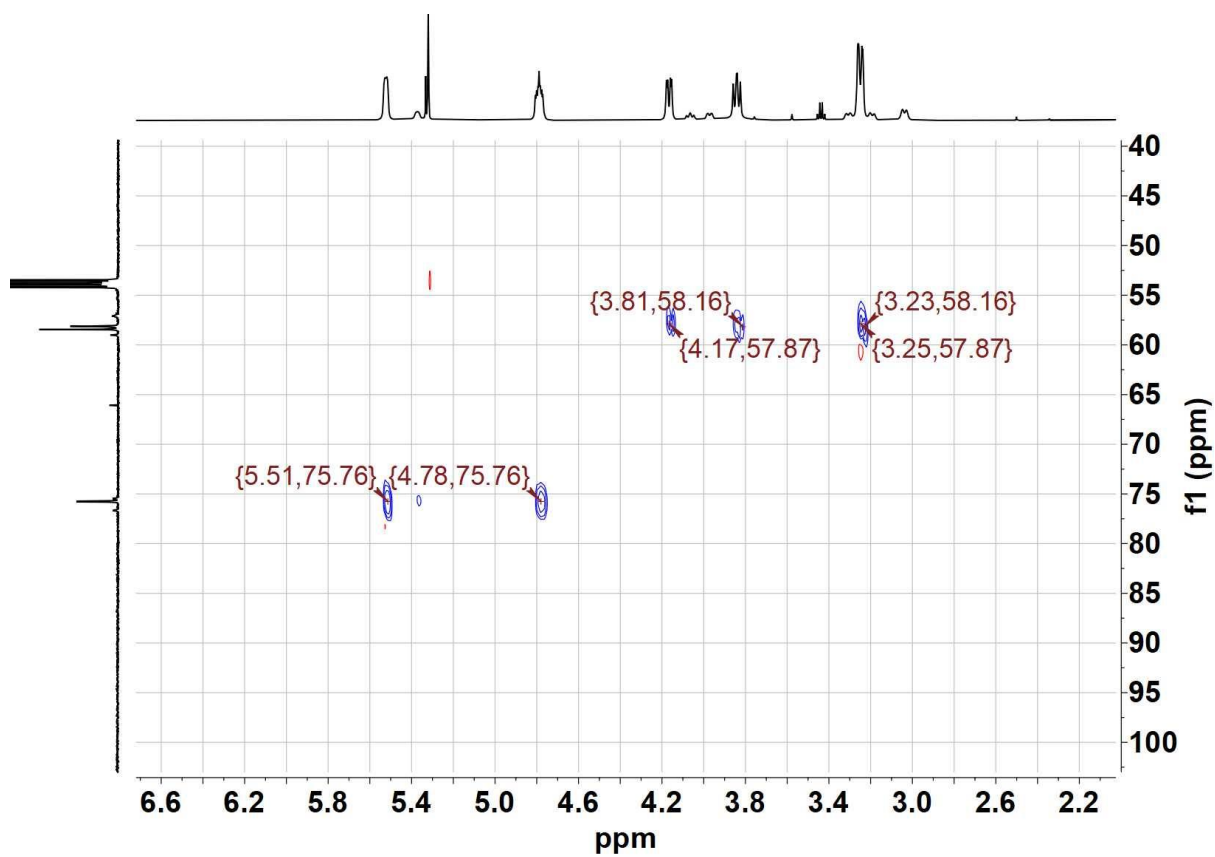

**Figure S10.** 2D-HSQC ( $^1\text{H}$ - $^{13}\text{C}$ ) NMR spectrum ( $\text{CH}_2$  region) of  $[\text{Fe}_2[(\text{SCH}_2)_2\text{NCH}_2](\text{CO})_4(\text{PMe}_3)_2]\text{BAr}^{\text{F}_4}$  ( $[\mathbf{2}]\text{BAr}^{\text{F}_4}$ ) in  $\text{CD}_2\text{Cl}_2$  at room temperature.

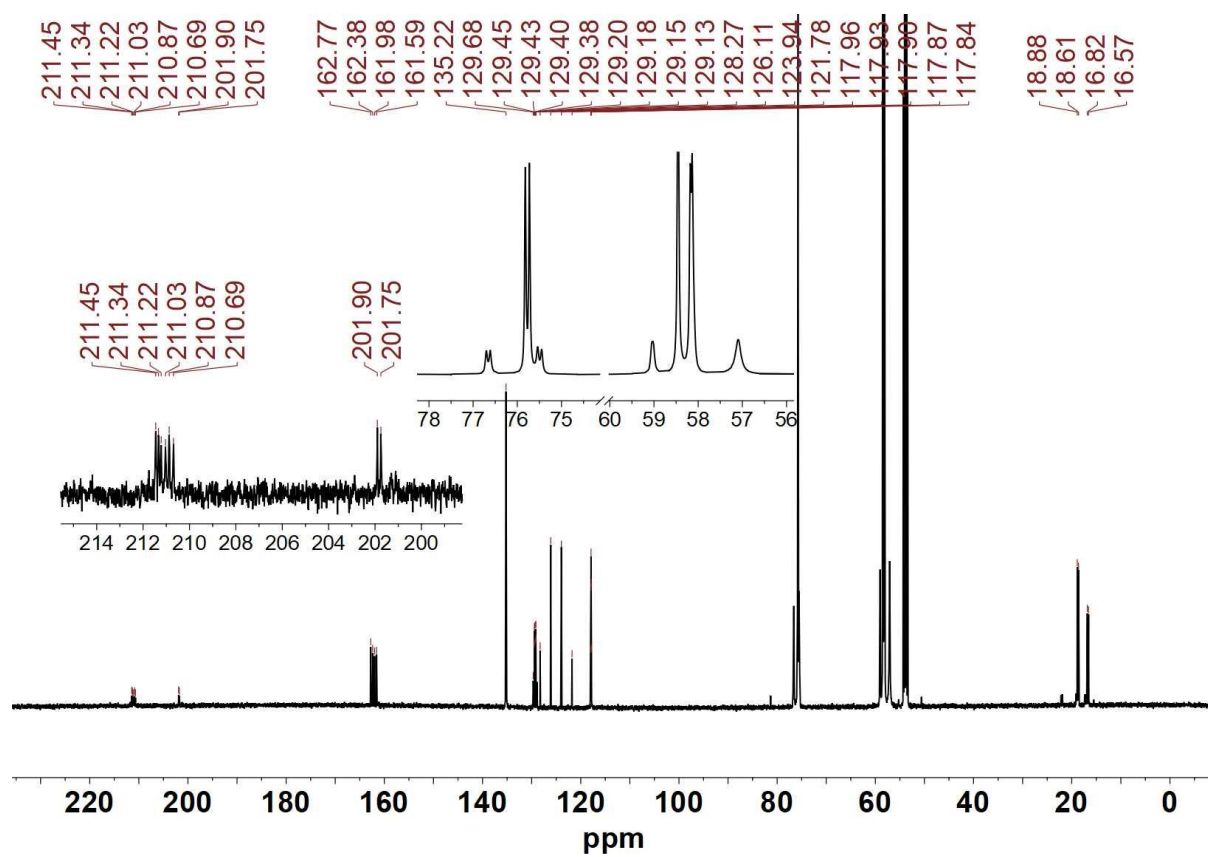

**Figure S11.**  $^{13}\text{C}$  NMR spectrum of  $^{13}\text{C}$  labeled  $[\text{Fe}_2[(\text{SCH}_2)_2\text{NCH}_2](\text{CO})_4(\text{PMe}_3)_2]\text{BAR}^{\text{F}_4}$  ( $[\mathbf{2}]\text{BAR}^{\text{F}_4}$ ) in  $\text{CD}_2\text{Cl}_2$  at room temperature.

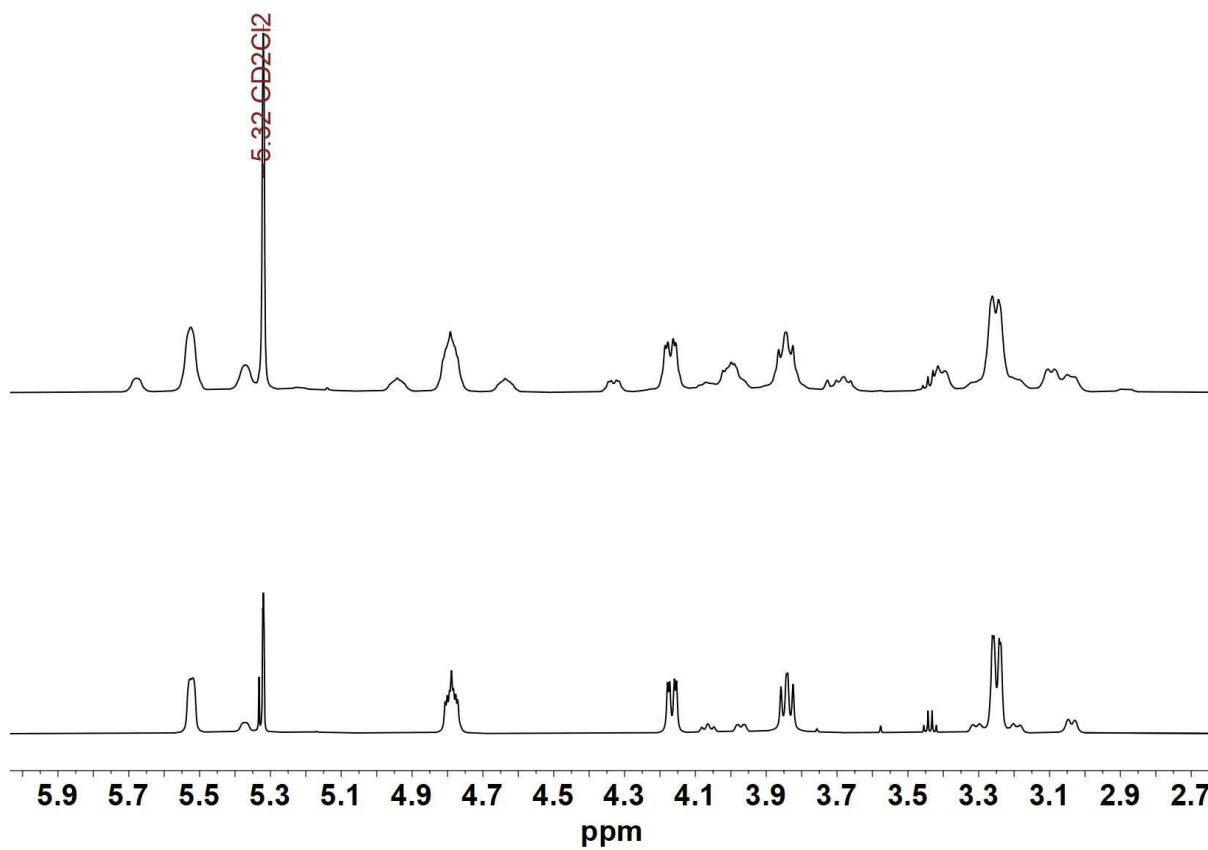

**Figure S12.**  $^1\text{H}$  NMR spectrum ( $\text{CH}_2$  region) of  $^{13}\text{C}$  labeled (top) and unlabeled (bottom)  $[\text{Fe}_2[(\text{SCH}_2)_2\text{NCH}_2](\text{CO})_4(\text{PMe}_3)_2]\text{BAR}^{\text{F}_4}$  ( $[\mathbf{2}]\text{BAR}^{\text{F}_4}$ ) in  $\text{CD}_2\text{Cl}_2$  at room temperature.

### Exchange Process in [2]BAr<sup>F</sup><sub>4</sub> Determined by Spin Saturation Transfer

1D Spin-Saturation Transfer (SST) experiment ( both <sup>31</sup>P and <sup>1</sup>H NMR) was used to monitor the slow exchange process in [2]BAr<sup>F</sup><sub>4</sub> in CD<sub>2</sub>Cl<sub>2</sub> at 298 K. One signal is selectively irradiated, and the signal intensity of the other peak connected with the irradiated signal via chemical exchange is monitored.

For exchange process of

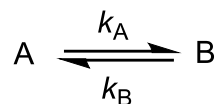

Selectively irradiation of peak A, the intensity of peak B changes following the equation below, and the exchange rate can be extracted:

$$\frac{I(t)}{I(0)} = \frac{\tau'}{\tau} \exp\left(-\frac{t}{\tau'}\right) + \frac{\tau'}{T_1}$$

$$\tau' = \frac{1}{\frac{1}{T_1} + \frac{1}{\tau}}$$

Where t is the irradiation time applied to peak A, T<sub>1</sub> is the longitudinal (spin-lattice) relaxation time of peak B (measured by inversion-recovery method here), τ is the life time of nuclei stays at site B, and the exchange rate k<sub>B</sub> = 1/τ.

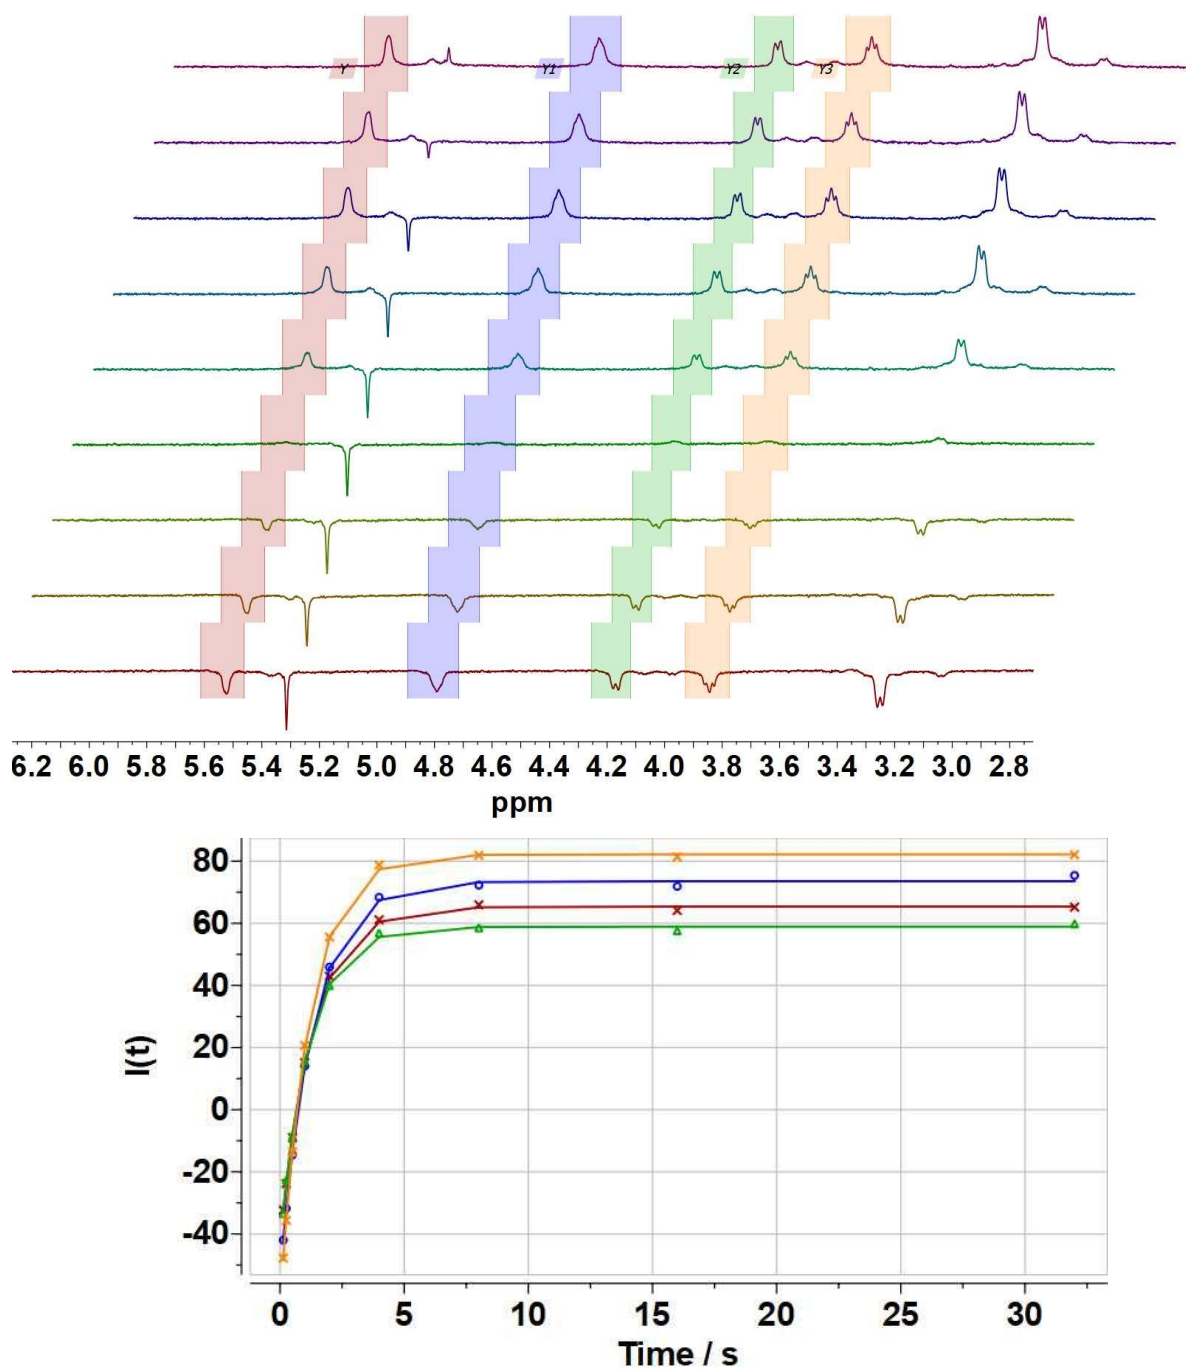

**Figure S13.** Stacked <sup>1</sup>H NMR spectra of [2]BAR<sup>F</sup><sub>4</sub> (29 mM) with different relaxation time in CD<sub>2</sub>Cl<sub>2</sub> at 298 K (top); Plot of peak intensity at  $\delta$  5.52 (red), 4.79 (blue), 4.17 (green) and 3.84 (orange) vs relaxation time (bottom).  
*Fitted with three parameter exponential equation:  $I_t = A + B \cdot \exp(-t/T_1)$ .*

**Results:**

$\delta$  5.52,  $T_1 = 1.29$  s;  $\delta$  4.79,  $T_1 = 1.31$  s;

$\delta$  4.17,  $T_1 = 1.17$  s;  $\delta$  3.84,  $T_1 = 1.17$  s.



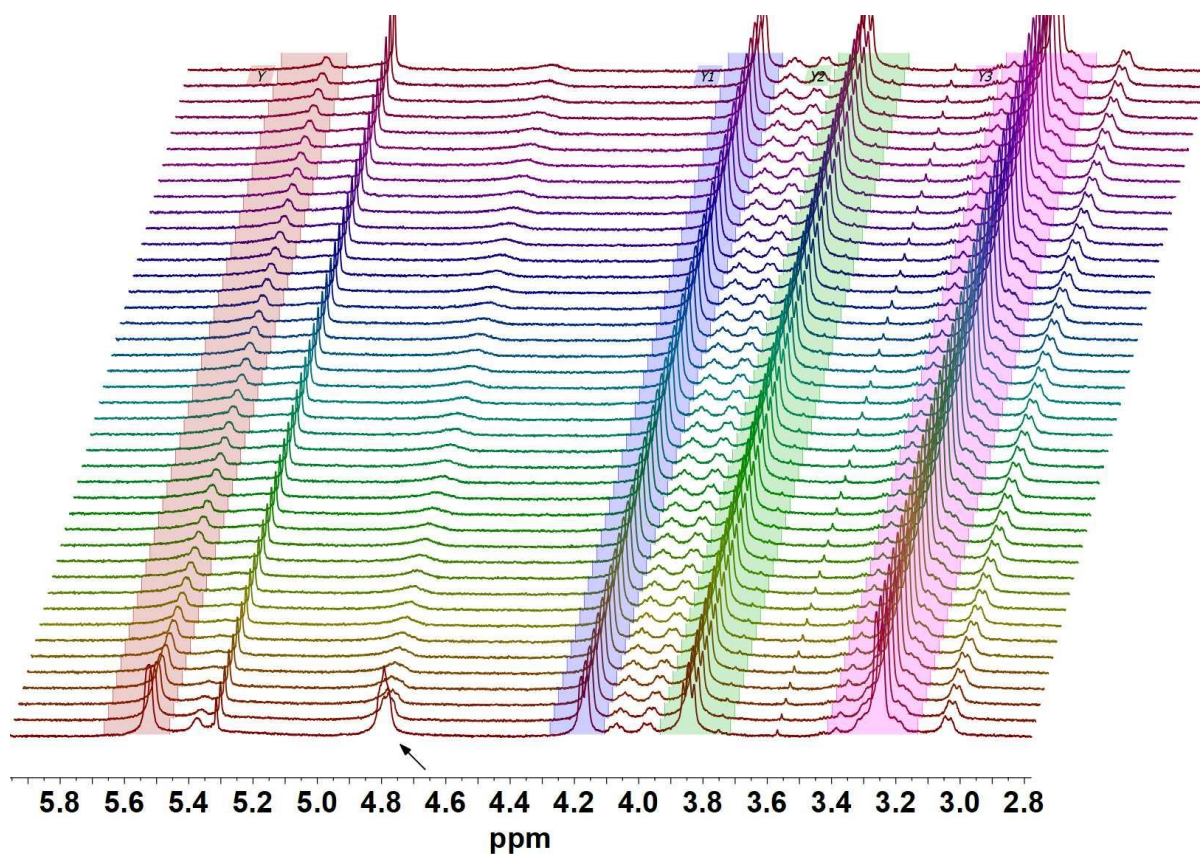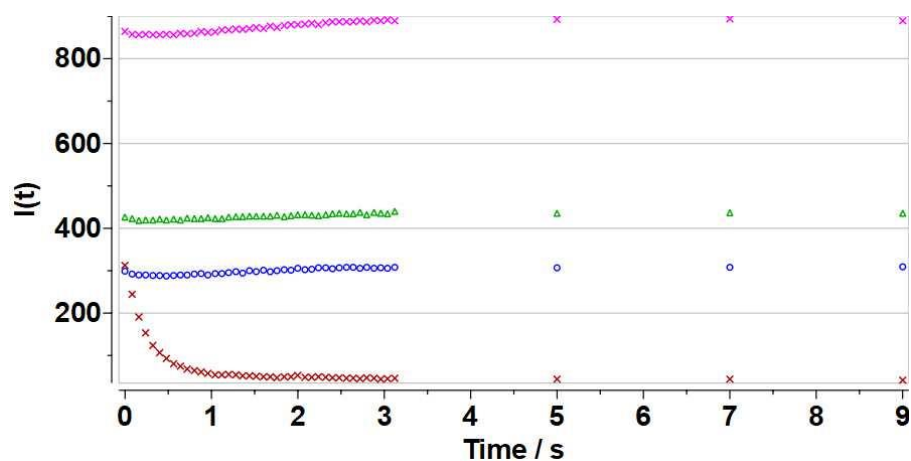

**Figure S14.**  $^1\text{H}$  NMR spectra of  $[\mathbf{2}]\text{BARF}_4$  (29 mM) at 298 K in  $\text{CD}_2\text{Cl}_2$  showing the change in intensity of the proton signal at  $\delta$  5.52, 4.17, 3.84 and 3.25 upon irradiation at  $\delta$  4.79 (top), and the plot of intensity vs irradiation time at  $\delta$  4.79 (bottom).

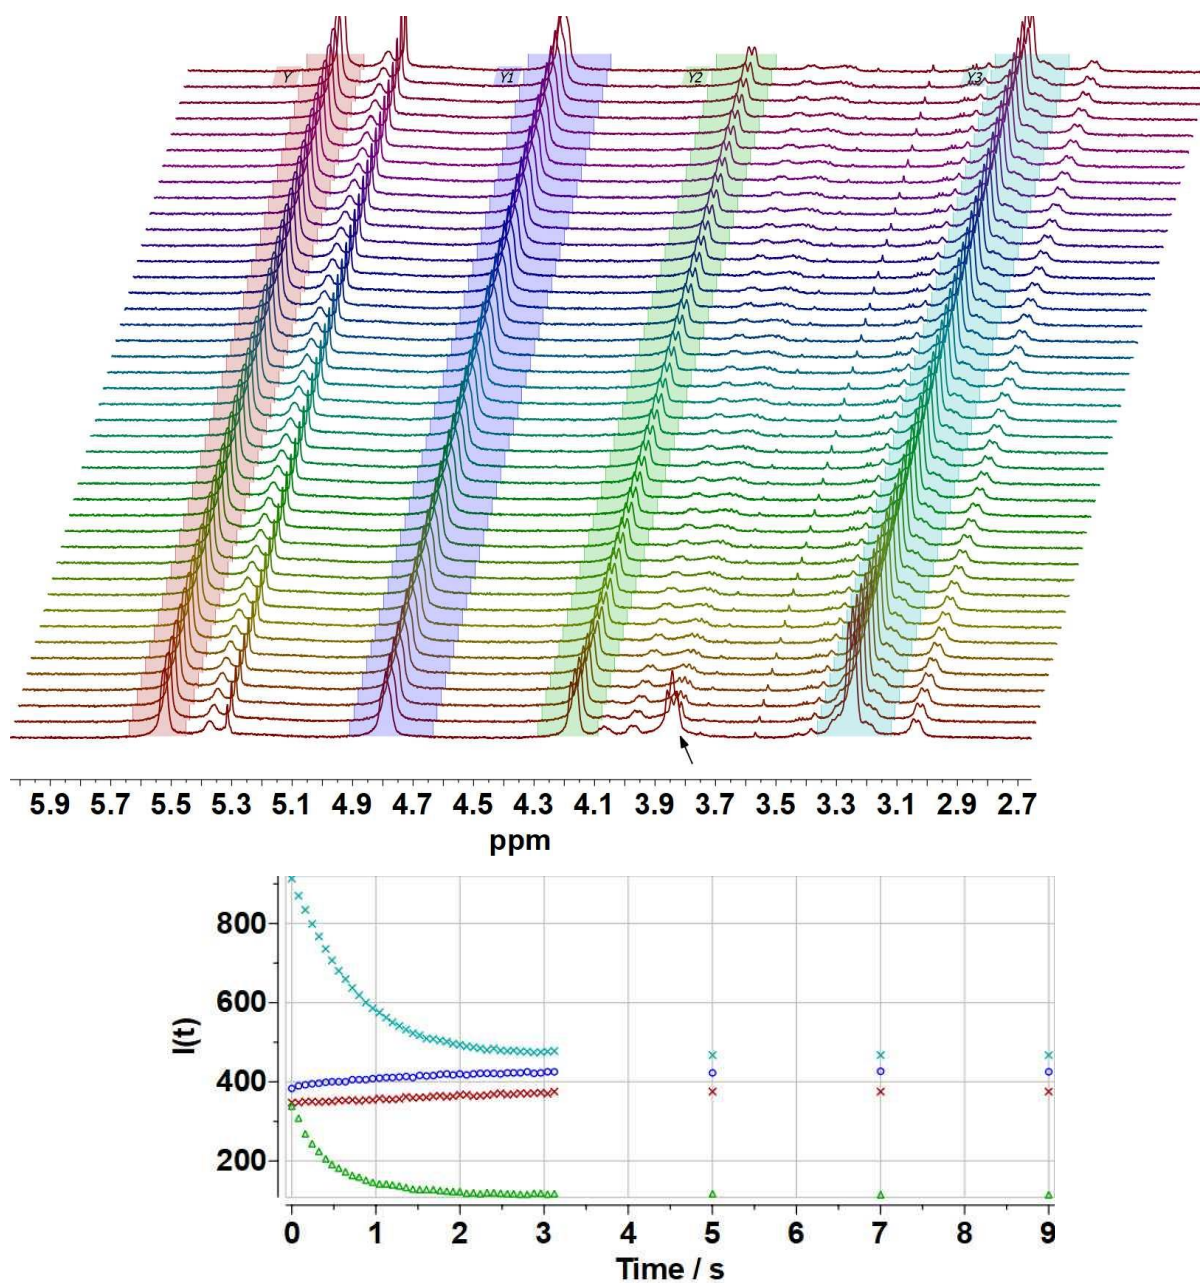

**Figure S15.** <sup>1</sup>H NMR spectra of [2]BARF<sub>4</sub> (29 mM) at 298 K in CD<sub>2</sub>Cl<sub>2</sub> showing the change in intensity of the proton signal at  $\delta$  5.52, 4.79, 4.17 and 3.25 upon irradiation at  $\delta$  3.84 (top), and the plot of intensity vs irradiation time at  $\delta$  3.84 (bottom).



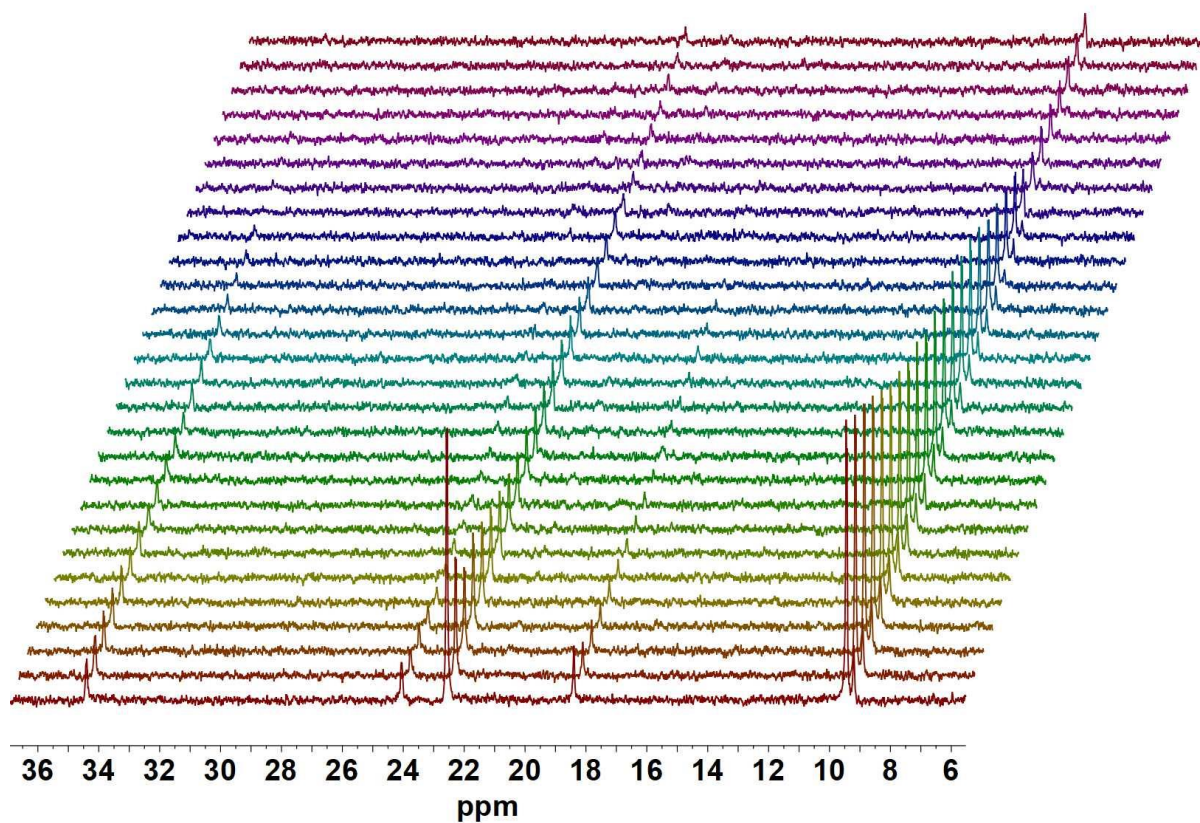

**Figure S16.** Spin saturation transfer spectra of  $[2]\text{BARF}_4$  at 298 K in  $\text{CD}_2\text{Cl}_2$ , showing the decline in intensity of the phosphine signal at  $\delta$  9.45, 24.10, 18.41 and 9.21 upon irradiation at  $\delta$  22.59.

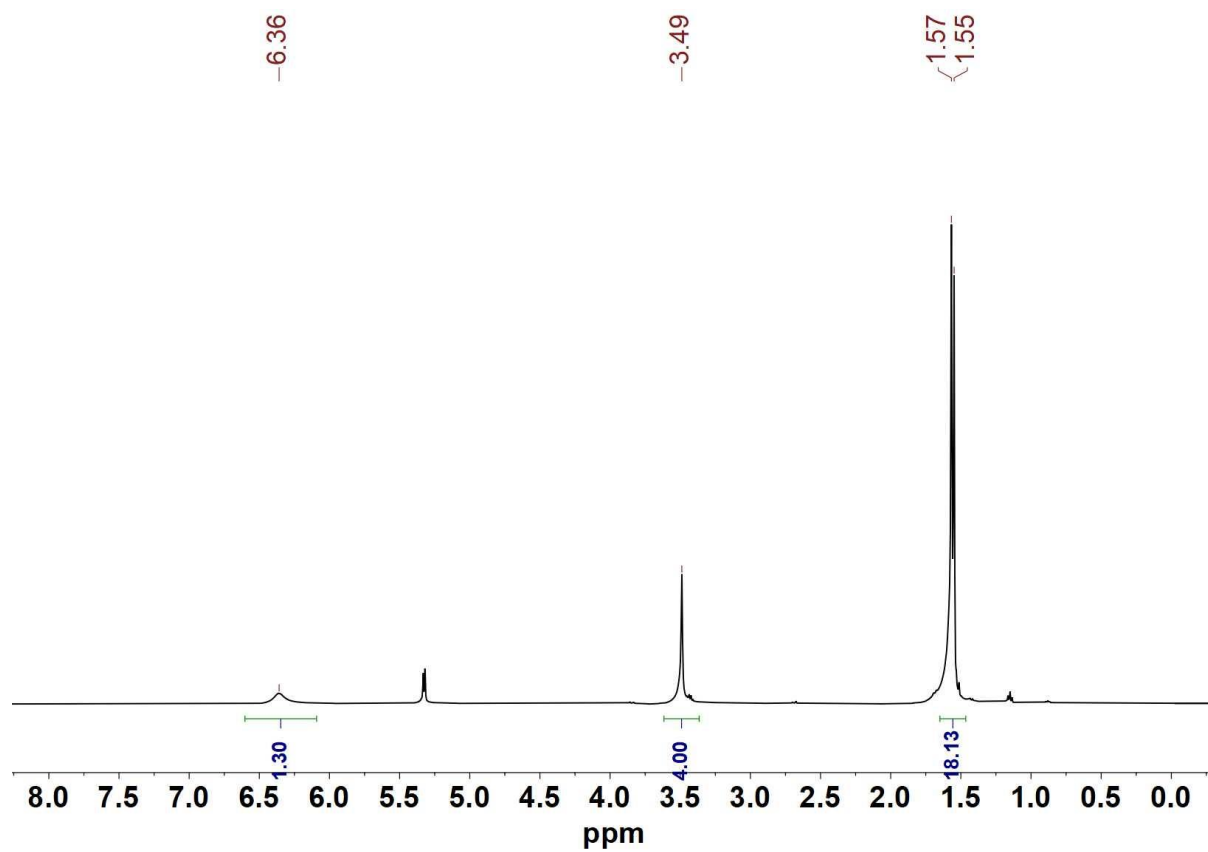

**Figure S17.**  $^1\text{H}$  NMR spectrum of  $[\text{Fe}_2[(\text{SCH}_2)_2\text{NH}_2](\text{CO})_4(\text{PMe}_3)_2]\text{BF}_4$  ( $[\text{H}]\text{BF}_4$ ) in  $\text{CD}_2\text{Cl}_2$  at room temperature.

S21

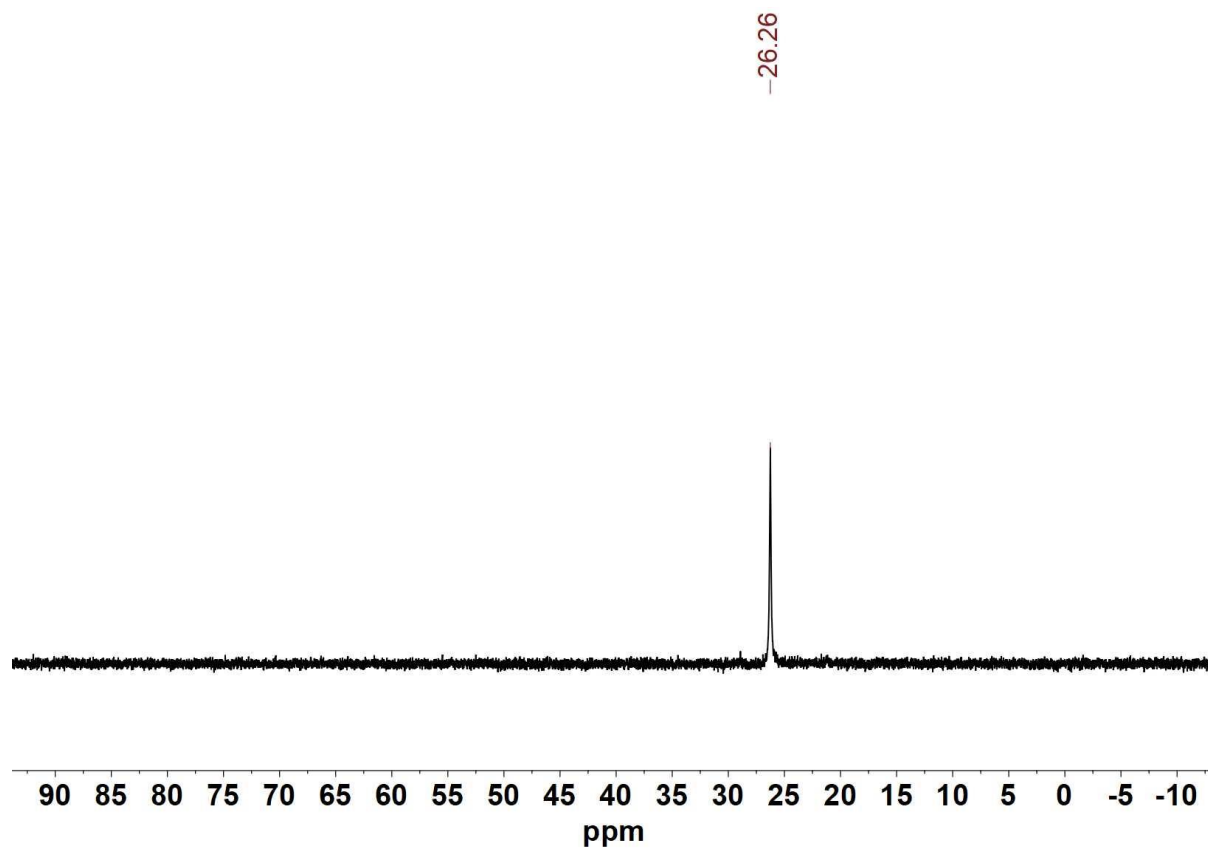

**Figure S18.**  $^{31}\text{P}$  NMR spectrum of  $[\text{Fe}_2[(\text{SCH}_2)_2\text{NH}_2](\text{CO})_4(\text{PMe}_3)_2]\text{BF}_4$  ( $[\text{1H}]\text{BF}_4$ ) in  $\text{CD}_2\text{Cl}_2$  at room temperature.

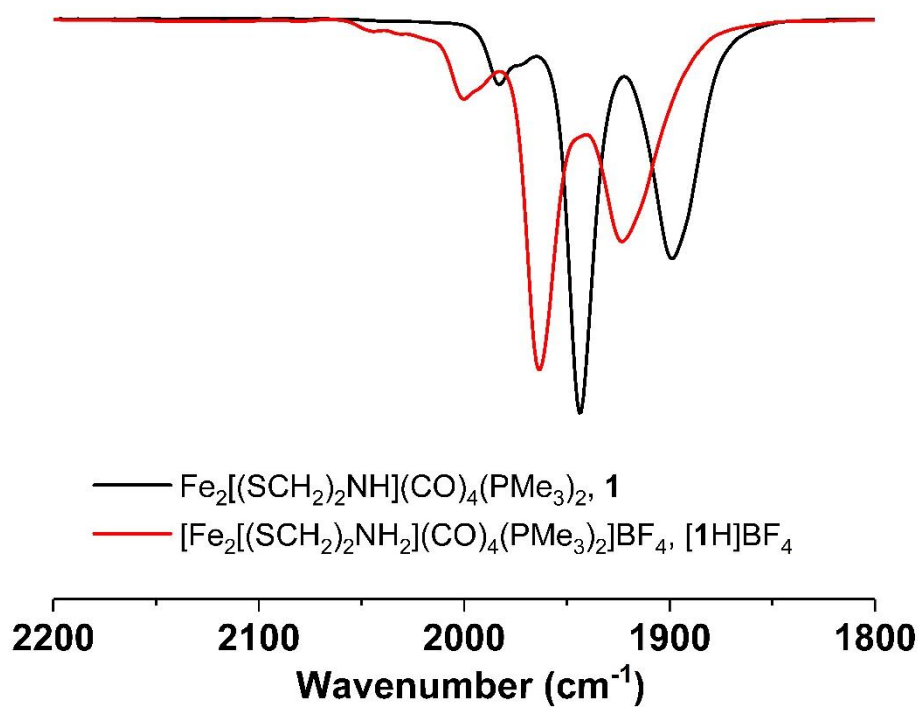

**Figure S19.** IR spectra of  $\text{Fe}_2[(\text{SCH}_2)_2\text{NH}](\text{CO})_4(\text{PMe}_3)_2$  (**1**) and  $[\text{Fe}_2[(\text{SCH}_2)_2\text{NH}_2](\text{CO})_4(\text{PMe}_3)_2]\text{BF}_4$  ( $[\text{1H}]\text{BF}_4$ ) in  $\text{CH}_2\text{Cl}_2$  solution.

S23

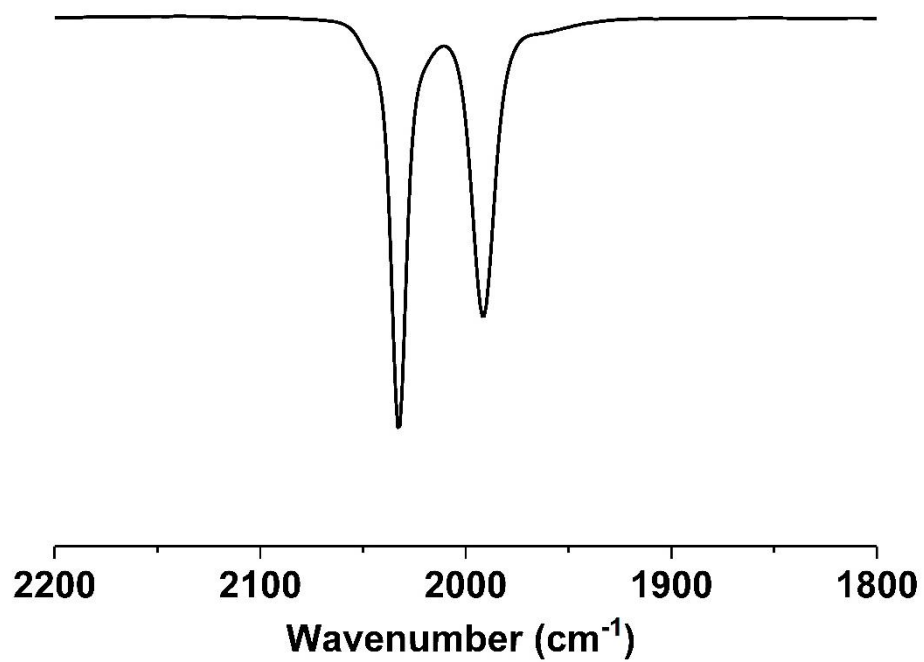

**Figure S20.** IR spectrum of  $[\text{HFe}_2[(\text{SCH}_2)_2\text{NH}](\text{CO})_4(\text{PMe}_3)_2]\text{BAr}^{\text{F}_4}$  ( $[\text{H1}]\text{BAr}^{\text{F}_4}$ ) in  $\text{CH}_2\text{Cl}_2$  solution.

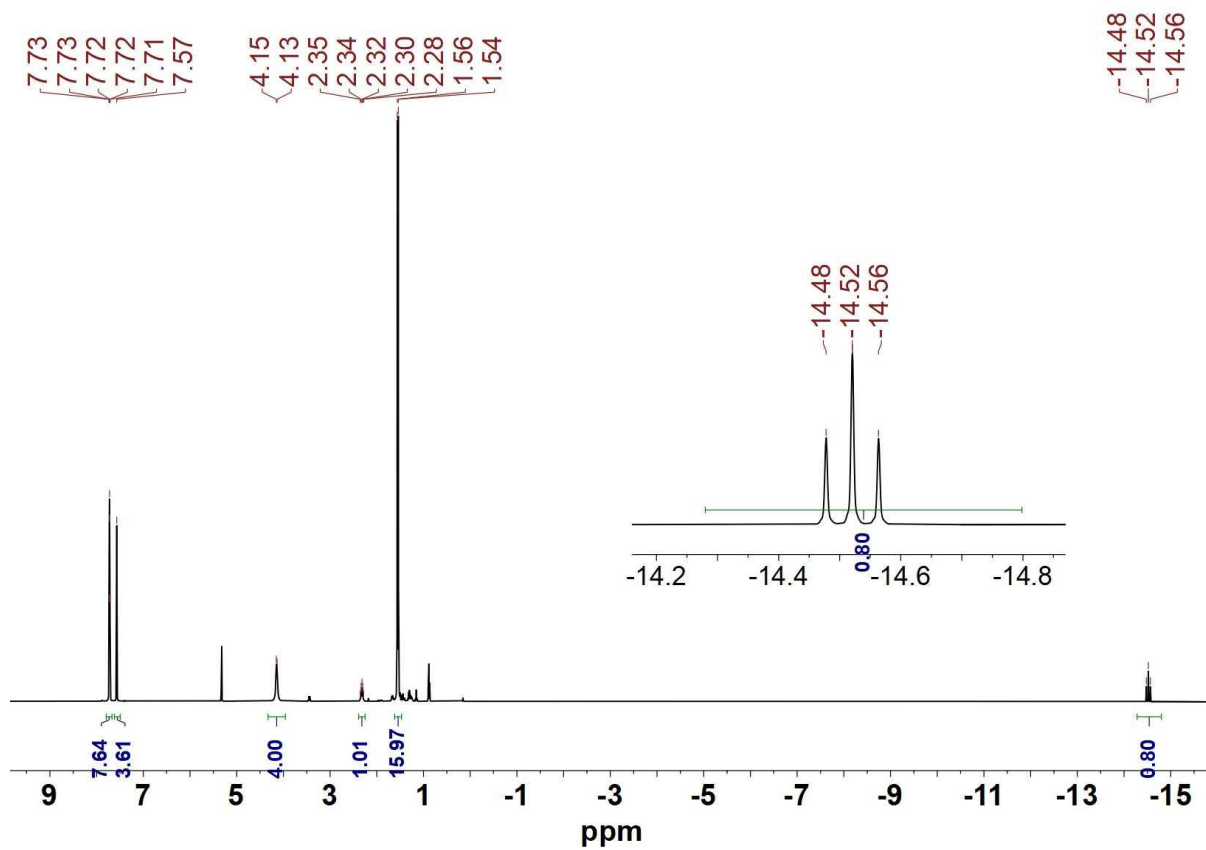

**Figure S21.**  $^1\text{H}$  NMR spectrum of  $[\text{HFe}_2((\text{SCH}_2)_2\text{NH})(\text{CO})_4(\text{PMe}_3)_2]\text{BAr}^{\text{F}}_4$  ( $[\text{H1}]\text{BAr}^{\text{F}}_4$ ) in  $\text{CD}_2\text{Cl}_2$  at room temperature.



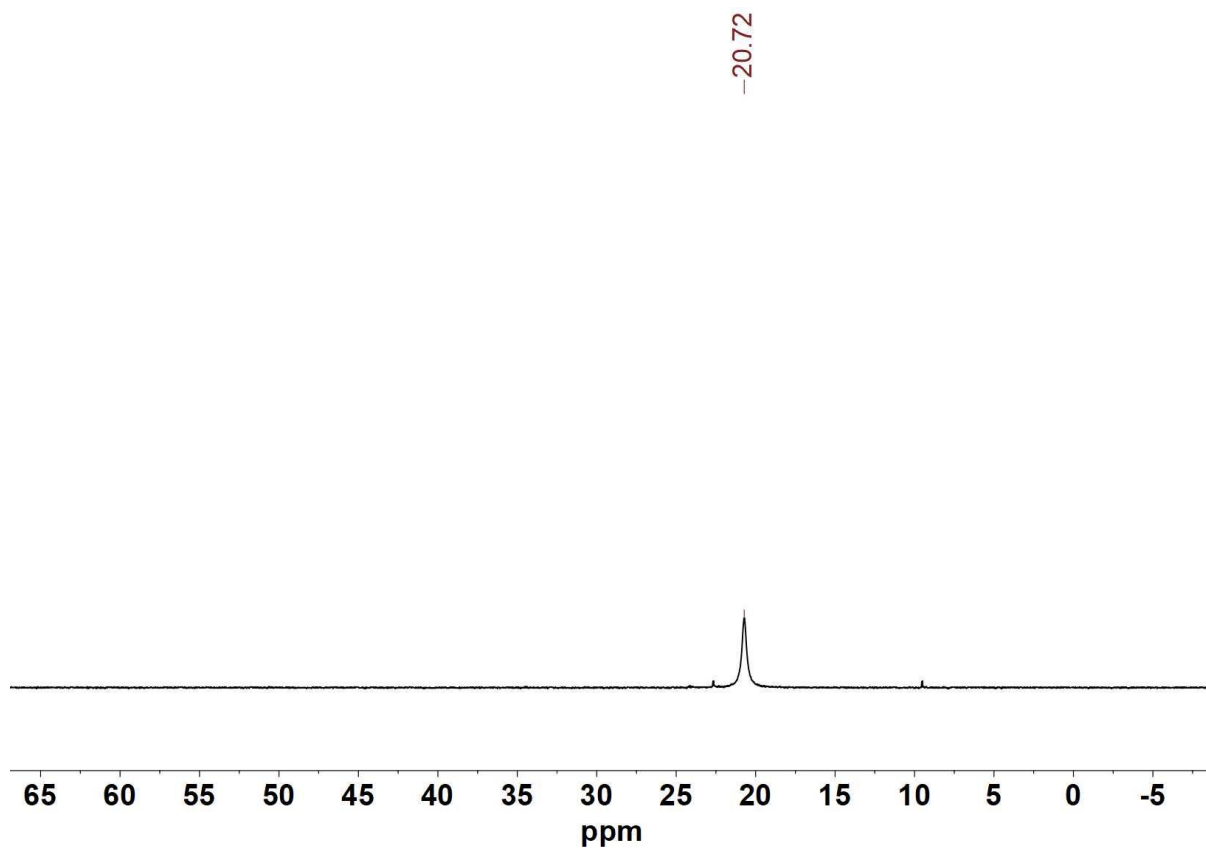

**Figure S22.**  $^{31}\text{P}$  NMR spectrum of  $[\text{HFe}_2[(\text{SCH}_2)_2\text{NH}](\text{CO})_4(\text{PMe}_3)_2]\text{BAr}^{\text{F}_4}$  ( $[\text{H1}]\text{BAr}^{\text{F}_4}$ ) in  $\text{CD}_2\text{Cl}_2$  at room temperature.

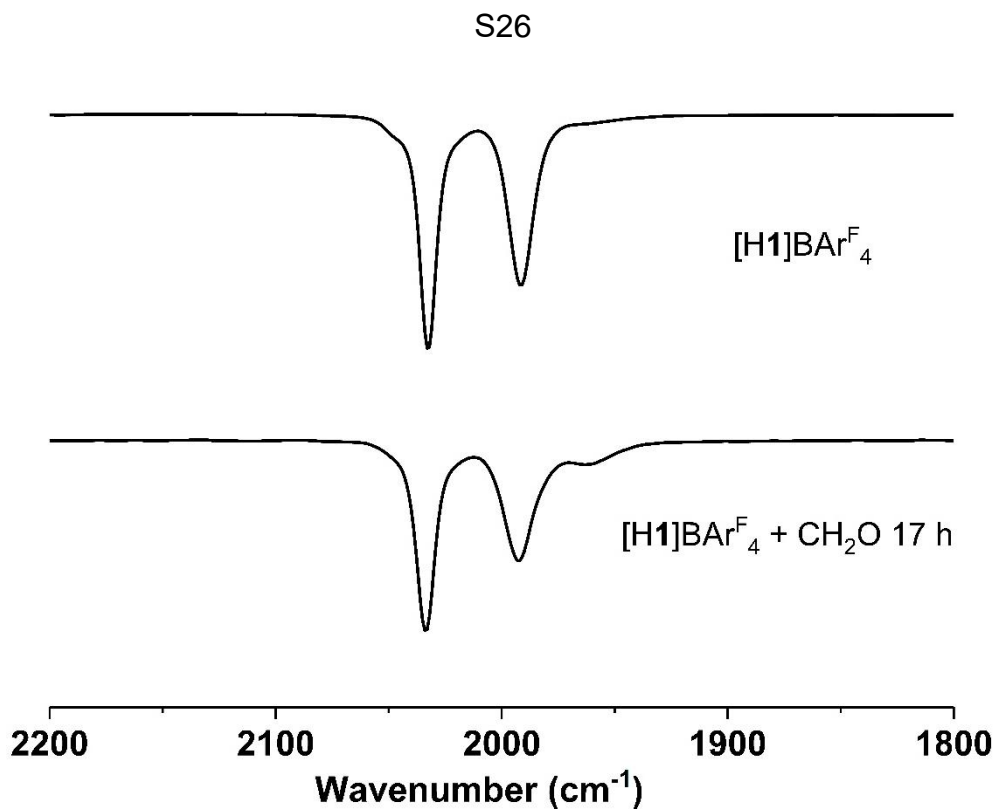

**Figure S23.** IR spectrum for reaction of  $[\text{HFe}_2[(\text{SCH}_2)_2\text{NH}](\text{CO})_4(\text{PMe}_3)_2]\text{BAr}^{\text{F}_4}$  ( $[\text{H1}]\text{BAr}^{\text{F}_4}$ ) with 3 equiv paraformaldehyde in  $\text{CH}_2\text{Cl}_2$  solution.

*The result indicates the reaction of hydride tautomer  $[\text{H1}]^+$  with paraformaldehyde does not give  $[\text{2}]^+$ , which highlight the role of the ammonium center in the conversion of **1** to  $[\text{2}]^+$ .*

S27

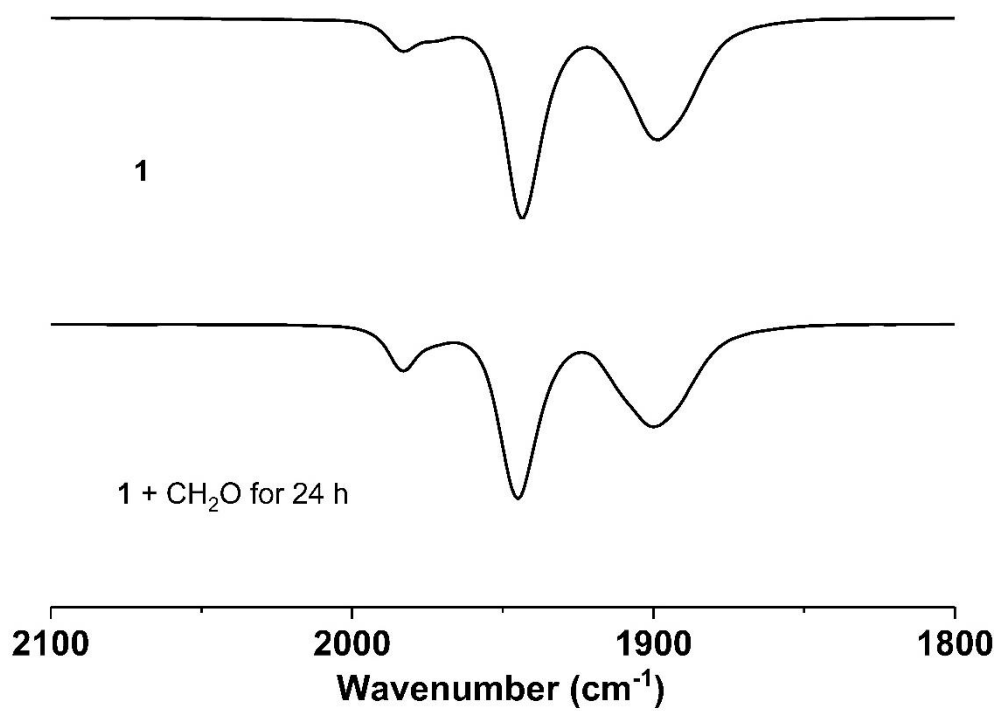

**Figure S24.** IR spectrum of  $\text{Fe}_2[(\text{SCH}_2)_2\text{NH}](\text{CO})_4(\text{PMe}_3)_2$  (**1**) and **1** +  $\text{CH}_2\text{O}$  for 24 h in  $\text{CH}_2\text{Cl}_2$  solution.

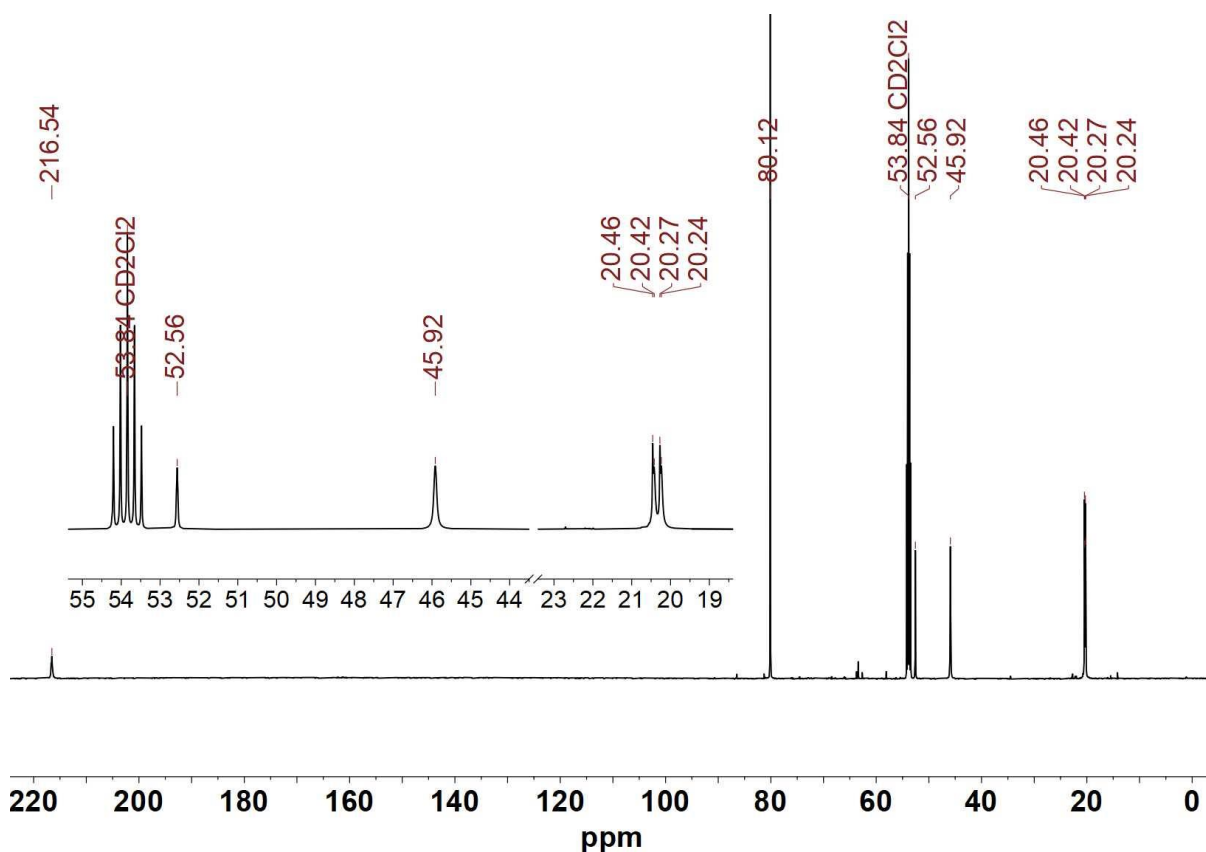

**Figure S25.**  $^{13}\text{C}$  NMR spectrum for the reaction of  $[\text{Fe}_2(\text{SCH}_2)_2\text{NH}(\text{CO})_4(\text{PMe}_3)_2]$  with 0.25 equiv  $^{13}\text{CH}_2\text{O}$  in  $\text{CD}_2\text{Cl}_2$  at room temperature.

**Assignments:**

$\delta$  80.11 (enriched with  $^{13}\text{C}$ ) and 52.56 ( $[\text{Fe}_2[(\text{SCH}_2)_2\text{N}^{13}\text{CH}_2\text{OH}](\text{CO})_4(\text{PMe}_3)_2]$ );  
 $\delta$  45.91 ( $[\text{Fe}_2[(\text{SCH}_2)_2\text{NH}](\text{CO})_4(\text{PMe}_3)_2]$ ).

In order to exam whether there is exchange during the formation of N-CH<sub>2</sub>-OH, the reaction of  $[\text{Fe}_2[(\text{SCH}_2)_2\text{NH}](\text{CO})_4(\text{PMe}_3)_2]$  with 0.25 equiv  $^{13}\text{CH}_2\text{O}$  in  $\text{CD}_2\text{Cl}_2$  was checked at room temperature. According to the  $^{13}\text{C}$  NMR determined after 72 h, two new peaks appeared at  $\delta$  80.11 (enriched with  $^{13}\text{C}$ ) and  $\delta$  52.56, which could be assigned to the 1 : 1 adduct of  $[\text{Fe}_2[(\text{SCH}_2)_2\text{N}^{13}\text{CH}_2\text{OH}](\text{CO})_4(\text{PMe}_3)_2]$ . However, the peak at  $\delta$  45.91 corresponding to the SCH<sub>2</sub> of  $\text{Fe}_2[(\text{SCH}_2)_2\text{NH}](\text{CO})_4(\text{PMe}_3)_2$  has not been enriched, indicating no exchange during this process.

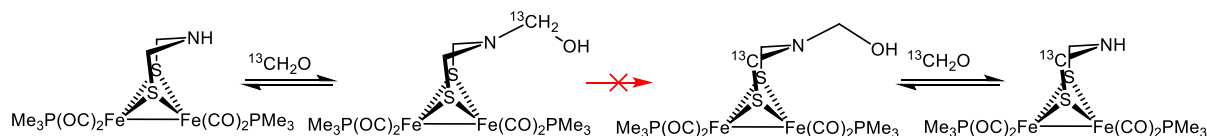

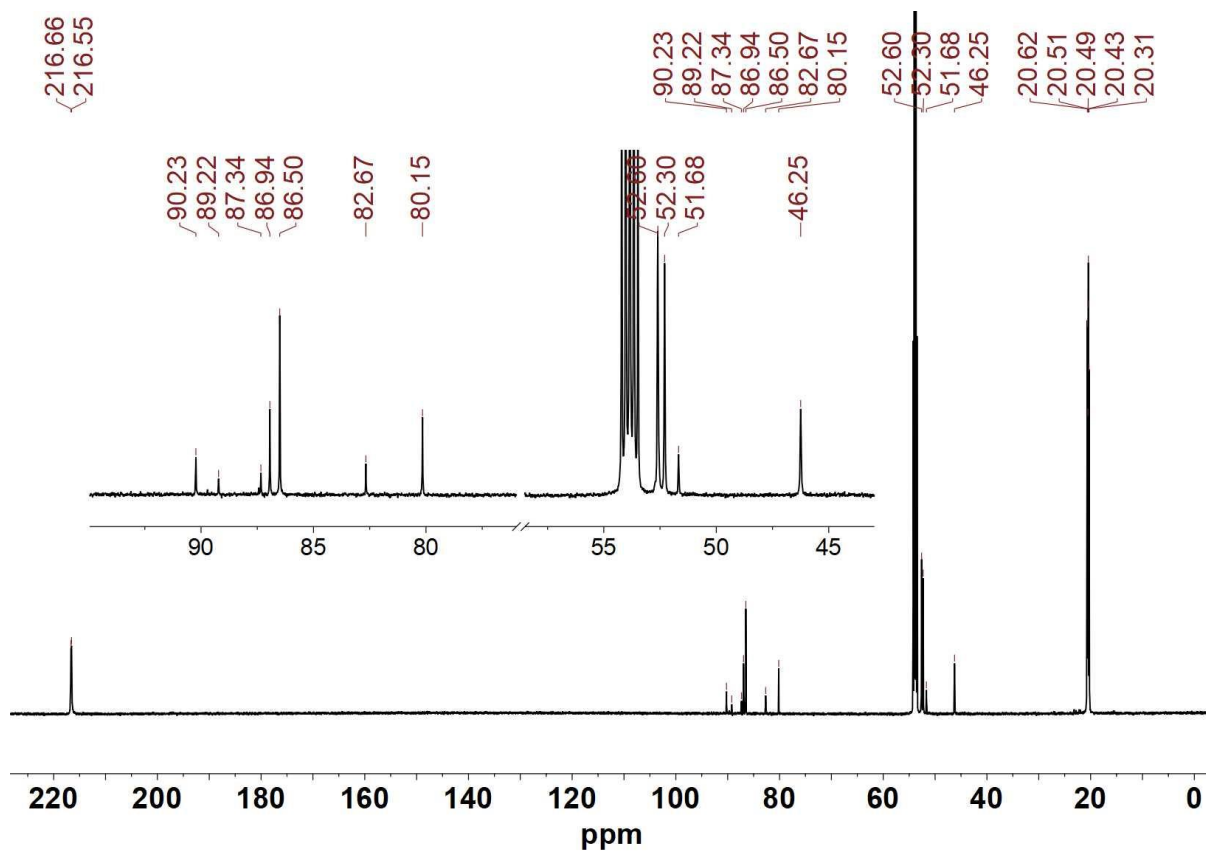

**Figure S26.**  $^{13}\text{C}$  NMR spectrum for the reaction of  $[\text{Fe}_2[(\text{SCH}_2)_2\text{NH}](\text{CO})_4(\text{PMe}_3)_2]$  with 1 equiv  $\text{CH}_2\text{O}$  in  $\text{CD}_2\text{Cl}_2$  at room temperature.

*Assignments:*

$\delta$  80.15 and 52.60 ( $[\text{Fe}_2[(\text{SCH}_2)_2\text{NCH}_2\text{OH}](\text{CO})_4(\text{PMe}_3)_2]$ );

$\delta$  90.23, 89.22, 87.34, 86.94, 86.50, 82.67 for  $-(\text{CH}_2)_n\text{-OH}$  and 52.30, 51.68 for  $\text{SCH}_2$  ( $[\text{Fe}_2[(\text{SCH}_2)_2\text{N}(\text{CH}_2)_n\text{OH}](\text{CO})_4(\text{PMe}_3)_2]$ );

$\delta$  45.91 ( $[\text{Fe}_2[(\text{SCH}_2)_2\text{NH}](\text{CO})_4(\text{PMe}_3)_2]$ ).

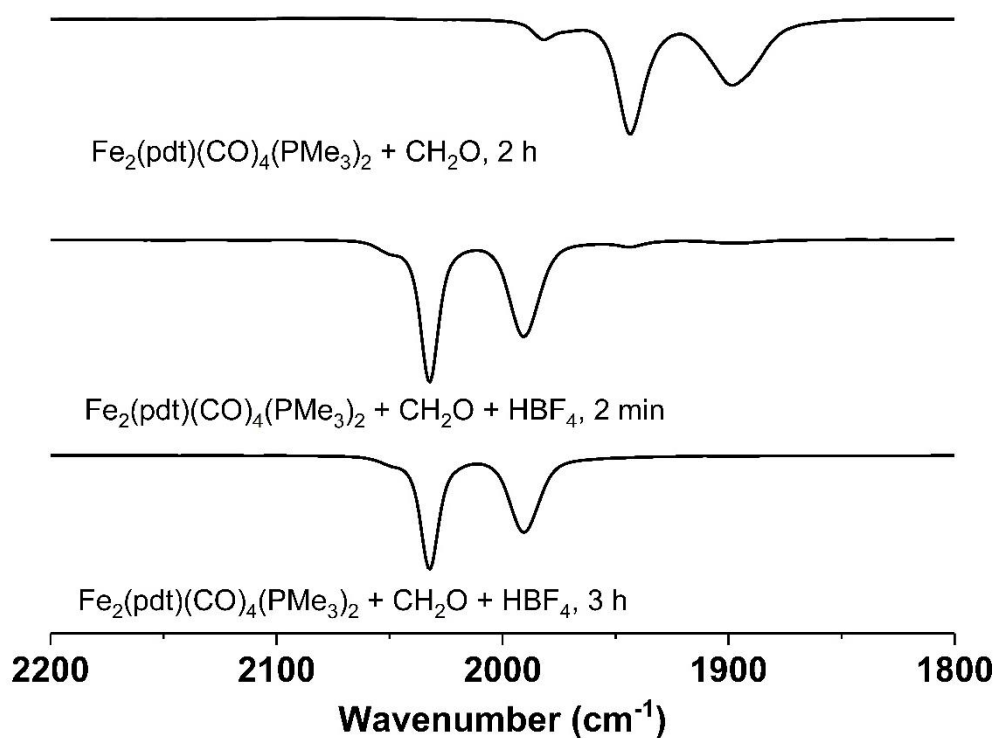

**Figure S27.** IR spectra for reaction of  $[\text{Fe}_2(\text{pdt})(\text{CO})_4(\text{PMe}_3)_2] + \text{CH}_2\text{O} + \text{HBF}_4$  in  $\text{CH}_2\text{Cl}_2$  solution.

*According to the IR spectra, no reaction is evident when  $[\text{Fe}_2(\text{pdt})(\text{CO})_4(\text{PMe}_3)_2]$  was treated with  $\text{CH}_2\text{O}$ . In the presence of 1 equiv  $\text{HBF}_4$ , bridging hydride  $[\text{HFe}_2(\text{pdt})(\text{CO})_4(\text{PMe}_3)_2]\text{BF}_4$  was formed as the protonation product.*

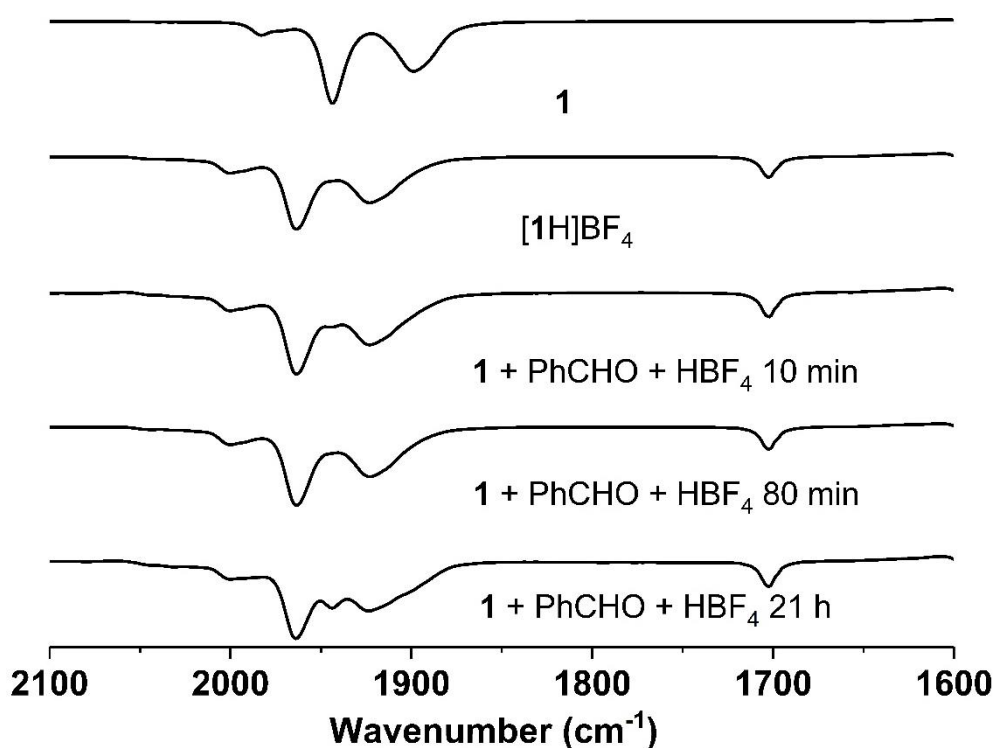

**Figure S28.** IR spectra for reaction of  $\text{Fe}_2[(\text{SCH}_2)_2\text{NH}](\text{CO})_4(\text{PMe}_3)_2$  (**1**) + PhCHO +  $\text{HBF}_4 \cdot \text{Et}_2\text{O}$  in  $\text{CH}_2\text{Cl}_2$  solution. The band at  $1702 \text{ cm}^{-1}$  is assigned to C=O vibration of PhCHO.

*According to the IR spectra, no reaction is evident when **1** was treated with PhCHO. In the presence of  $\text{HBF}_4$ , ( $[\text{Fe}_2[(\text{SCH}_2)_2\text{NH}_2](\text{CO})_4(\text{PMe}_3)_2]\text{BF}_4$ ) (**[1H]BF<sub>4</sub>**) was formed as the protonation product.*

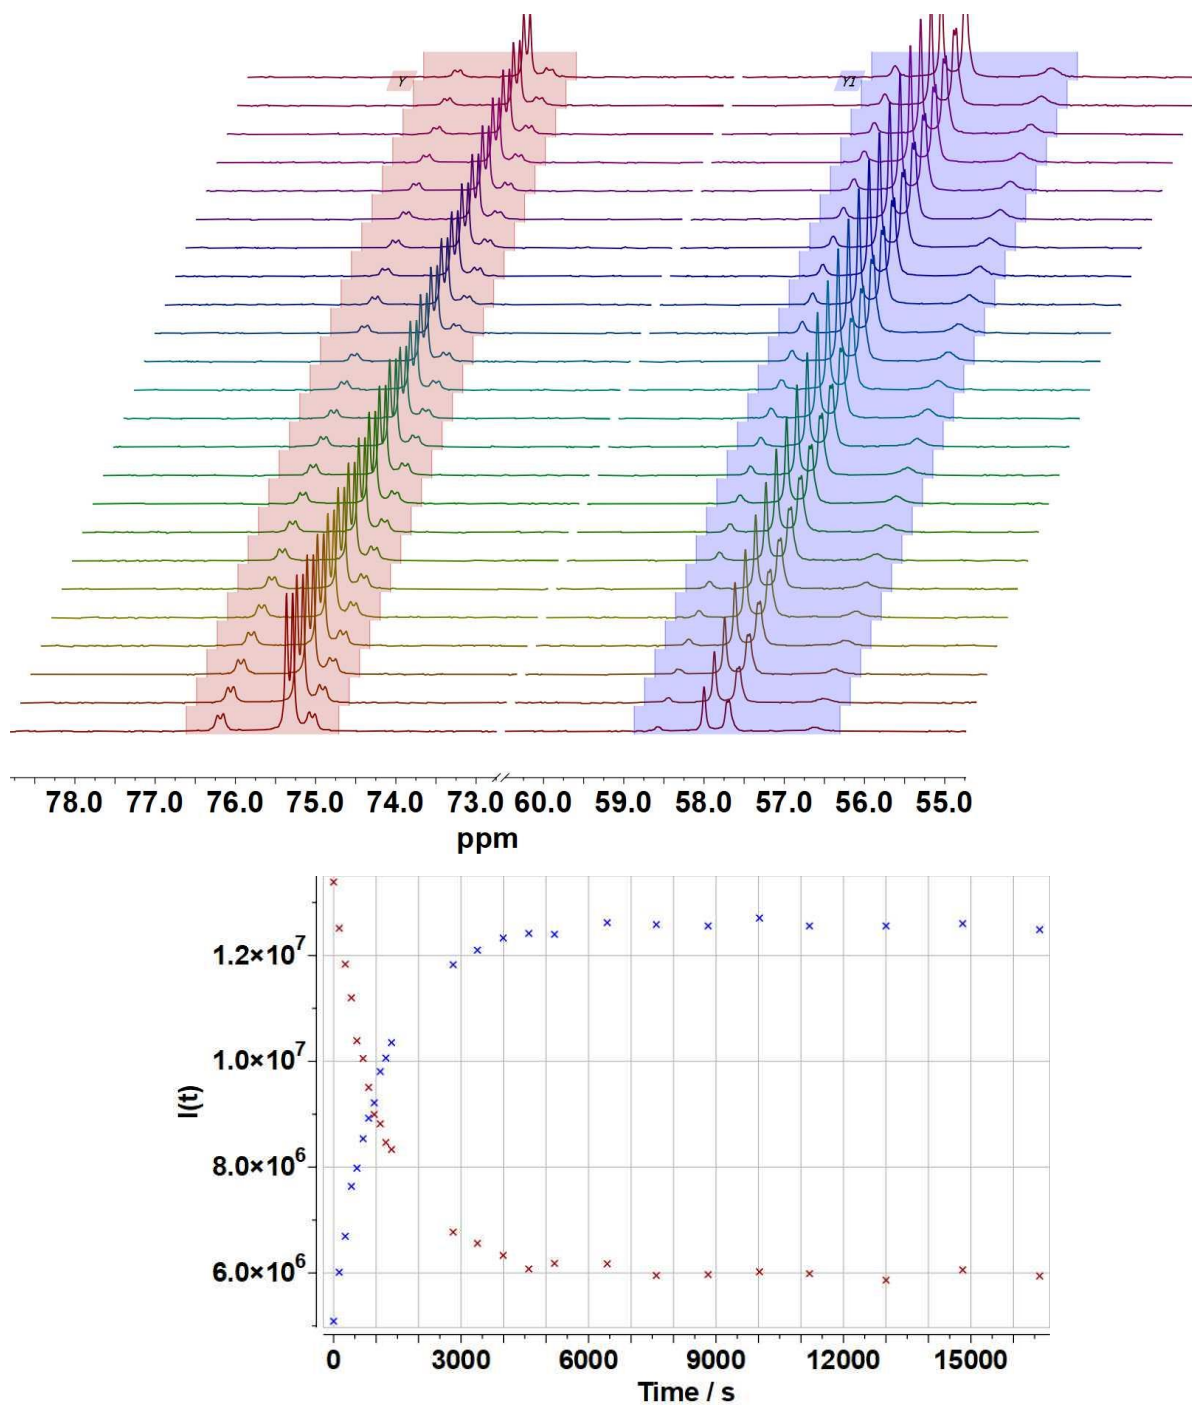

**Figure S29.**  $^{13}\text{C}$  NMR spectrum (CH<sub>2</sub> region) for the reaction of  $[\text{Fe}_2[(\text{SCH}_2)_2\text{NH}](\text{CO})_4(\text{PMe}_3)_2]$  (47 mM) +  $^{13}\text{CH}_2\text{O}$  +  $\text{HBArF}_4$  (1 : 1 : 1) over time in  $\text{CD}_2\text{Cl}_2$  at 296 K (top); Plot of peak intensity vs time, showing the decline in intensity of the signal at  $\delta$  76.66, 75.77, 75.49 (brown), and the increase in intensity of the signal at  $\delta$  59.03, 58.46, 58.16, 57.09 (blue) (bottom). The exchange process reaches equilibrium after ~90 minutes.



For the equilibrium

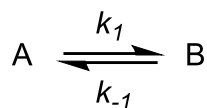

$k_1$  is the rate coefficient for the reaction that consumes A;  $k_{-1}$  is the rate coefficient for the backwards reaction, then

$$\frac{k_1}{k_{-1}} = \frac{[B]_e}{[A]_e}$$

$[A]_e$  and  $[B]_e$  are the concentrations of A and B at equilibrium, respectively.  $[A]_0$  is the initial concentration of reactant A,  $[A]_t$  is the concentration of A at time  $t$ , then

$$\ln\left(\frac{l_0 - l_e}{l_t - l_e}\right) = \ln\left(\frac{[A]_0 - [A]_e}{[A]_t - [A]_e}\right) = (k_1 + k_{-1})t$$

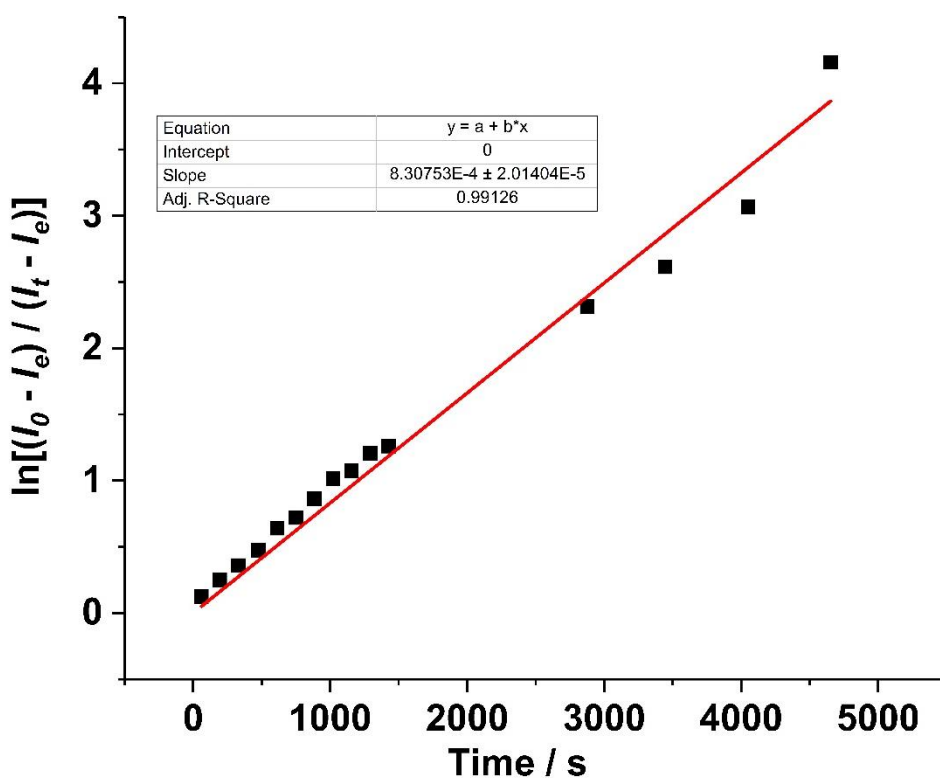

**Figure S30.** Plot of  $\ln[(l_0 - l_e)/(l_t - l_e)]$  vs reaction time ( $[2]^+_0 = 47$  mM). *Fitting equation:*  $\ln[(l_0 - l_e)/(l_t - l_e)] = (k_1 + k_{-1})t$ . *Results:*  $k_1 + k_{-1} = 8.31 \times 10^{-4} \pm 2.01 \times 10^{-5} \text{ s}^{-1}$ . The linear plot indicates the kinetics of exchange are first order in the concentration of  $[2]^+$ , which points to an intramolecular process.

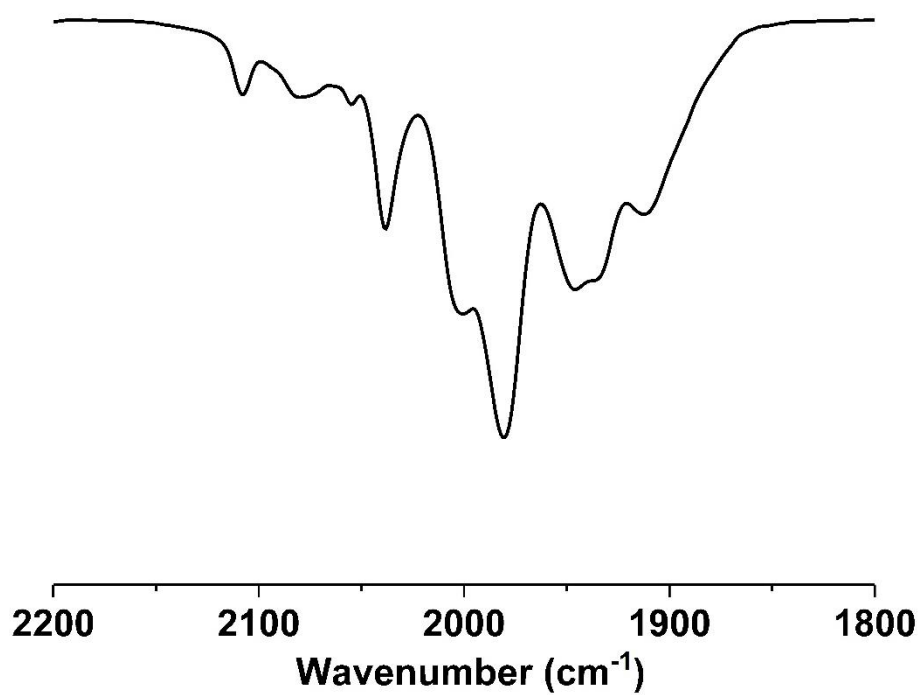

**Figure S31.** IR spectrum of crude  $\text{Et}_4\text{N}[\text{Fe}_2[(\text{SCH}_2)_2\text{NCH}_2\text{CN}](\text{CN})(\text{CO})_5]$  ( $\text{Et}_4\text{N}[\mathbf{4}]$ ) in  $\text{CH}_3\text{CN}$  solution.

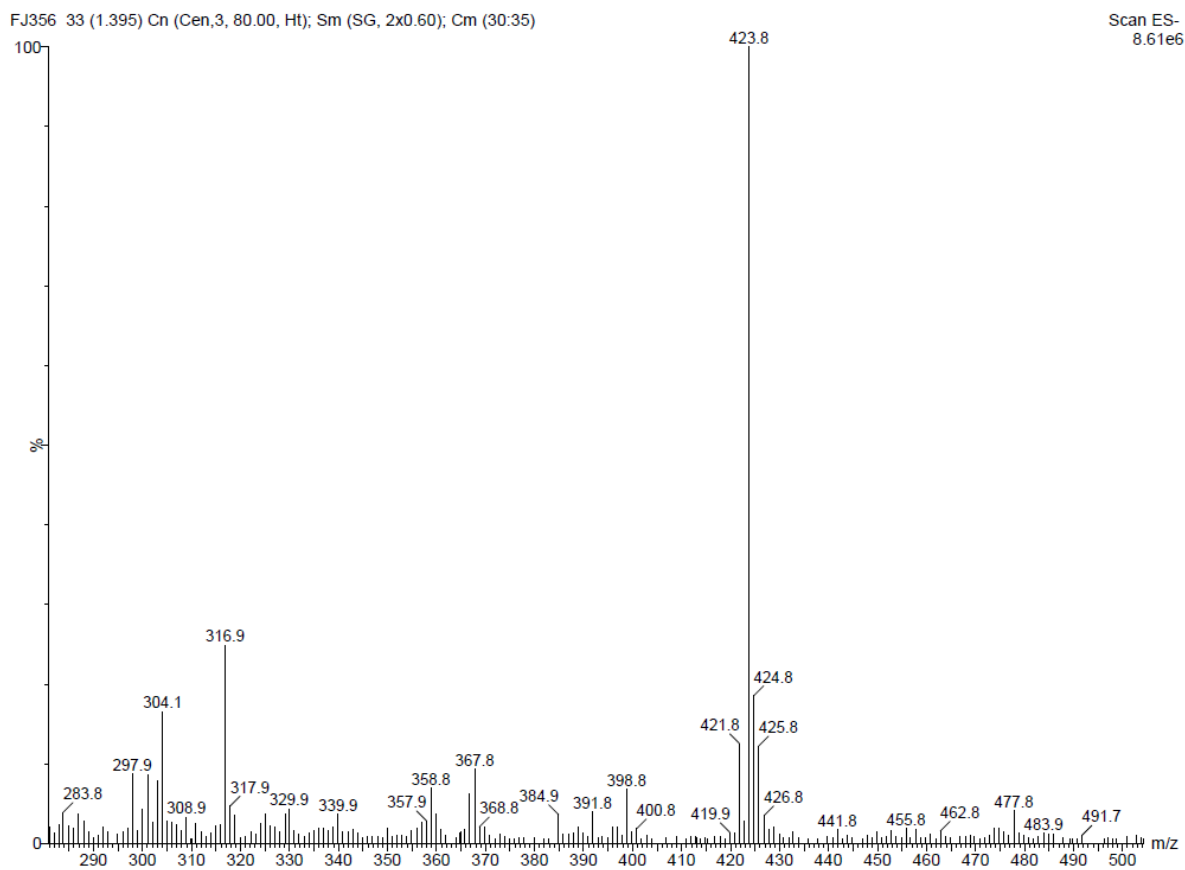

**Figure S32.** ESI-MS spectrum of  $\text{Et}_4\text{N}[\text{Fe}_2[(\text{SCH}_2)_2\text{NCH}_2\text{CN}](\text{CN})(\text{CO})_5]$  ( $\text{Et}_4\text{N}[\mathbf{4}]$ ) in  $\text{CH}_3\text{CN}$  solution.

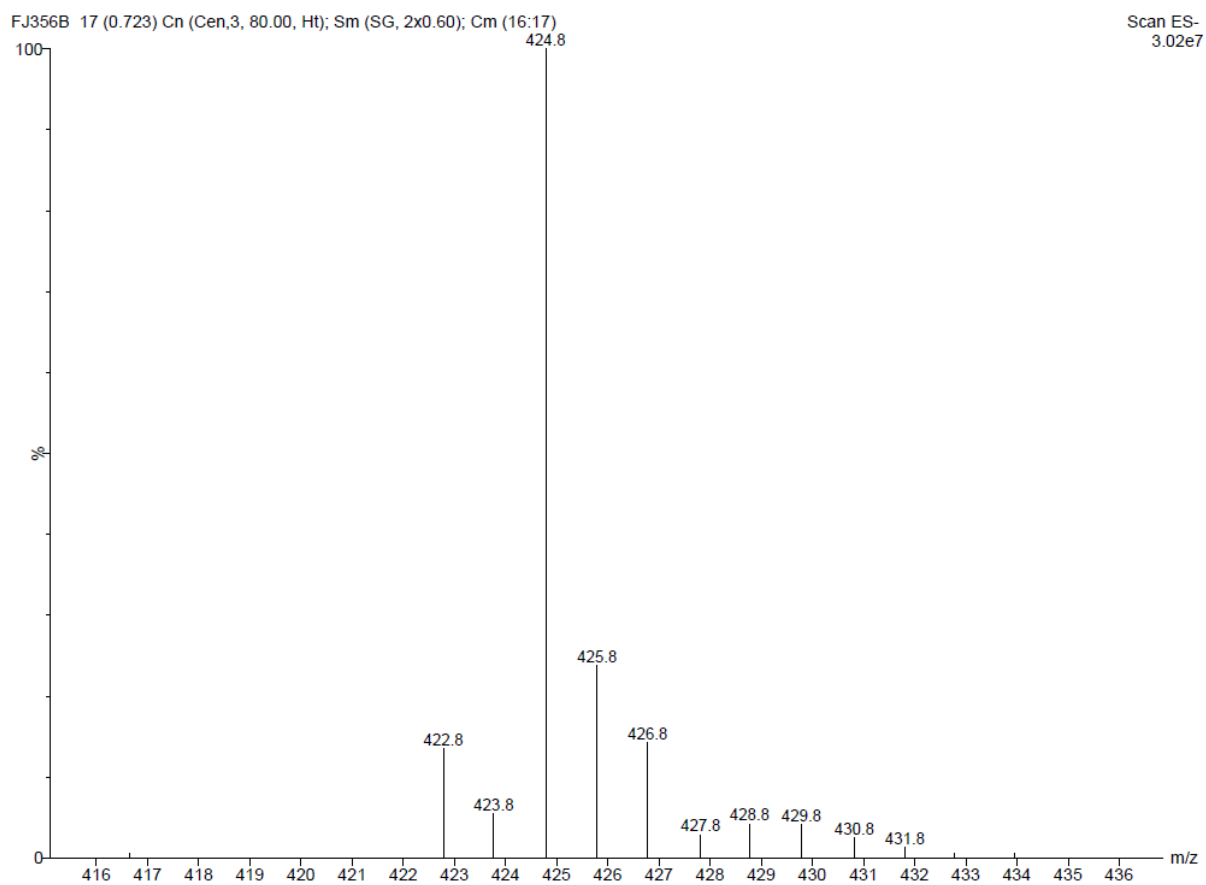

**Figure S33.** ESI-MS spectrum of  $^{13}\text{C}$  labeled  $\text{Et}_4\text{N}[\text{Fe}_2[(\text{SCH}_2)_2\text{NCH}_2\text{CN}](\text{CN})(\text{CO})_5]$  ( $\text{Et}_4\text{N}[\mathbf{4}]$ ) in  $\text{CH}_3\text{CN}$  solution.

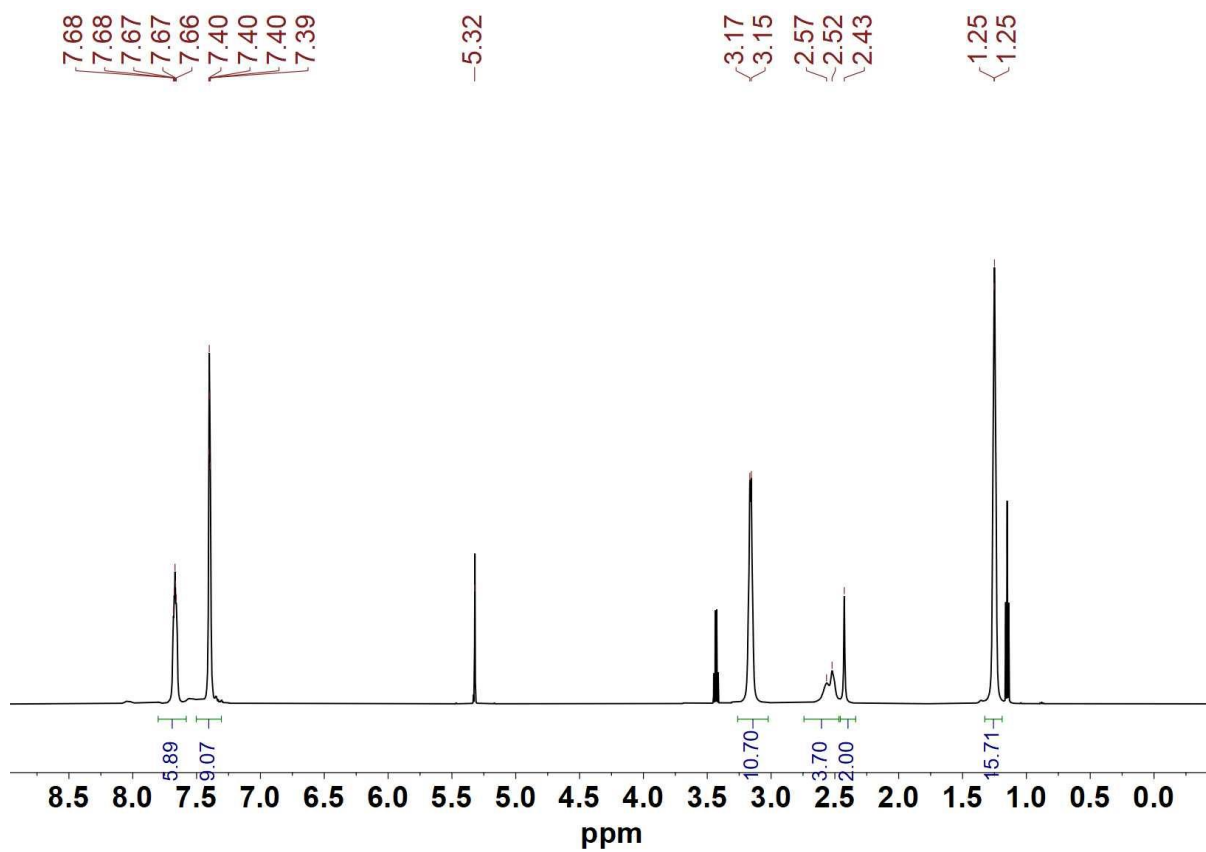

**Figure S34.**  $^1\text{H}$  NMR spectrum of  $\text{Et}_4\text{N}[\text{Fe}_2[(\text{SCH}_2)_2\text{NCH}_2\text{CN}](\text{CN})(\text{CO})_4\text{PPh}_3]$  ( $\text{Et}_4\text{N}[\mathbf{5}]$ ) in  $\text{CD}_2\text{Cl}_2$  at room temperature.

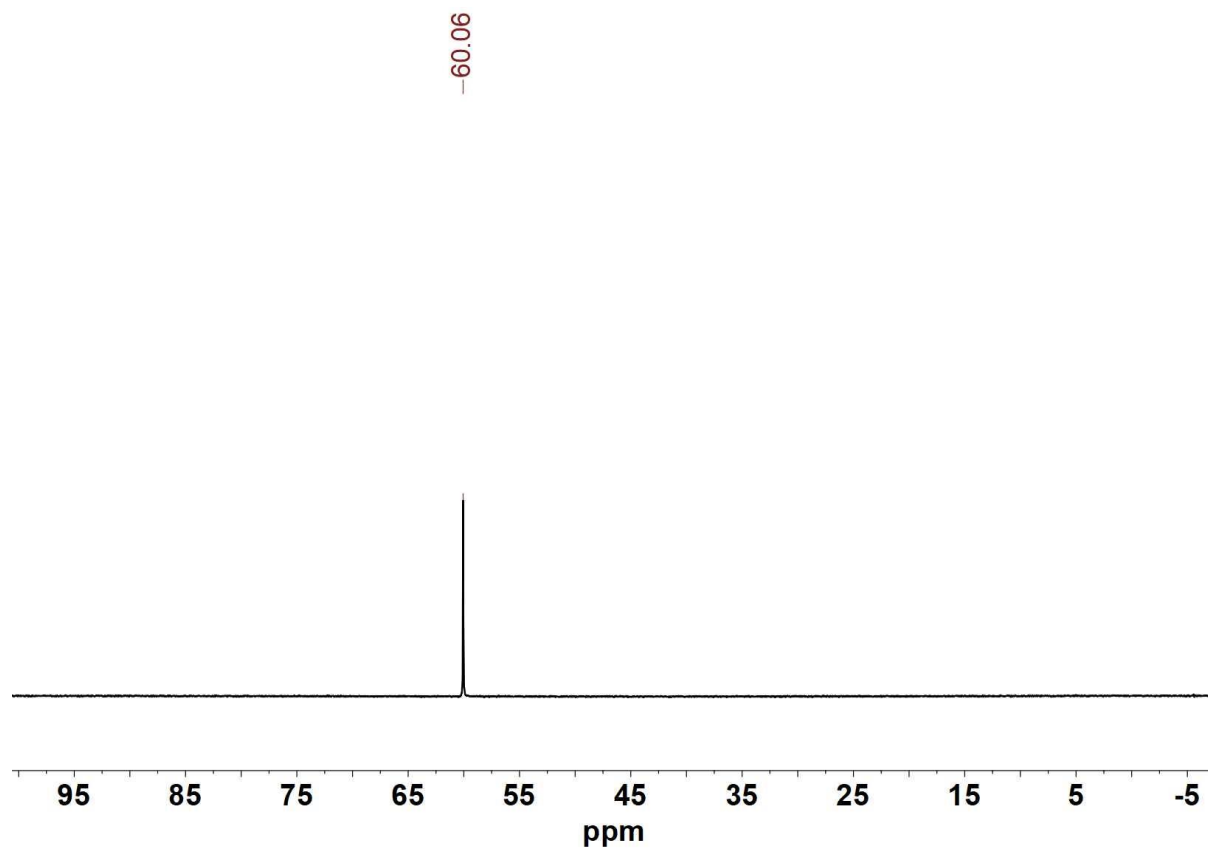

**Figure S35.**  $^{31}\text{P}$  NMR spectrum of  $\text{Et}_4\text{N}[\text{Fe}_2[(\text{SCH}_2)_2\text{NCH}_2\text{CN}](\text{CN})(\text{CO})_4\text{PPh}_3]$  ( $\text{Et}_4\text{N}[5]$ ) in  $\text{CD}_2\text{Cl}_2$  at room temperature.

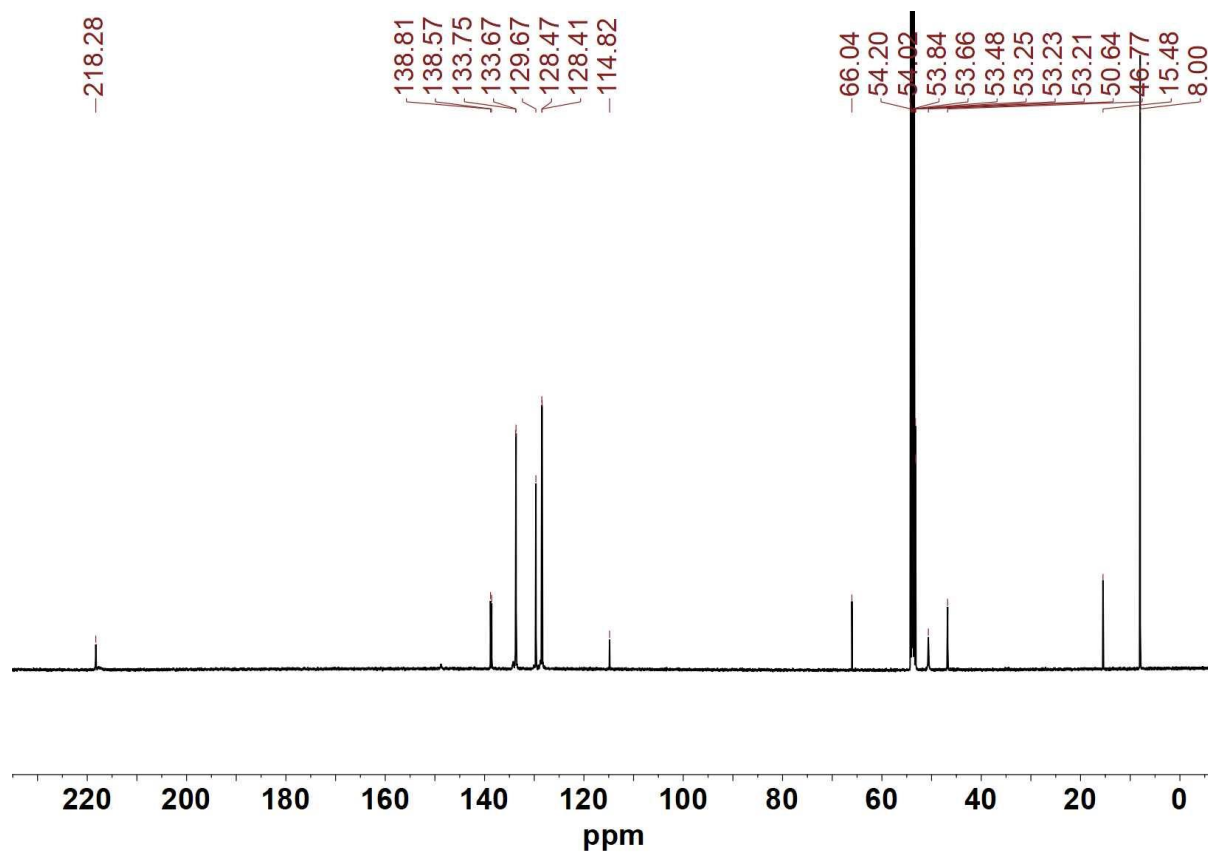

**Figure S36.**  $^{13}\text{C}$  NMR spectrum of  $\text{Et}_4\text{N}[\text{Fe}_2[(\text{SCH}_2)_2\text{NCH}_2\text{CN}](\text{CN})(\text{CO})_4(\text{PPh}_3)]$  ( $\text{Et}_4\text{N}[5]$ ) in  $\text{CD}_2\text{Cl}_2$  at room temperature.

*Assignments:*

$\delta$  66.04, 15.48 (diethyl ether)

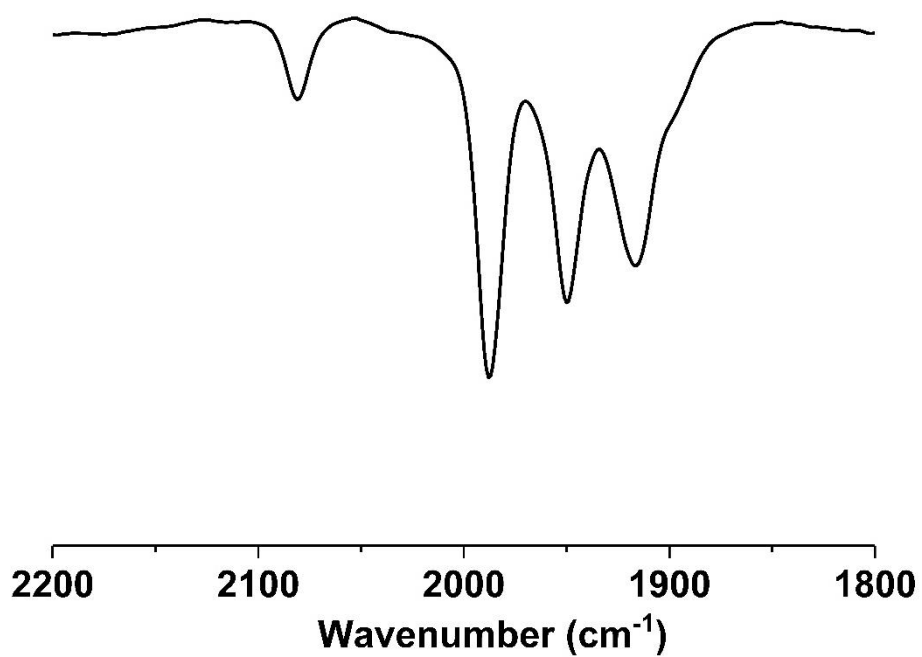

**Figure S37.** IR spectrum of  $\text{Et}_4\text{N}[\text{Fe}_2[(\text{SCH}_2)_2\text{NCH}_2\text{CN}](\text{CN})(\text{CO})_4\text{PPh}_3]$  ( $\text{Et}_4\text{N}[5]$ ) in  $\text{CH}_2\text{Cl}_2$  solution.



FJ356C-0701 29 (1.227) Cn (Cen,3, 80.00, Ht); Sm (SG, 2x0.60); Cm (27:30-5:14x4.000)

Scan ES-  
1.73e6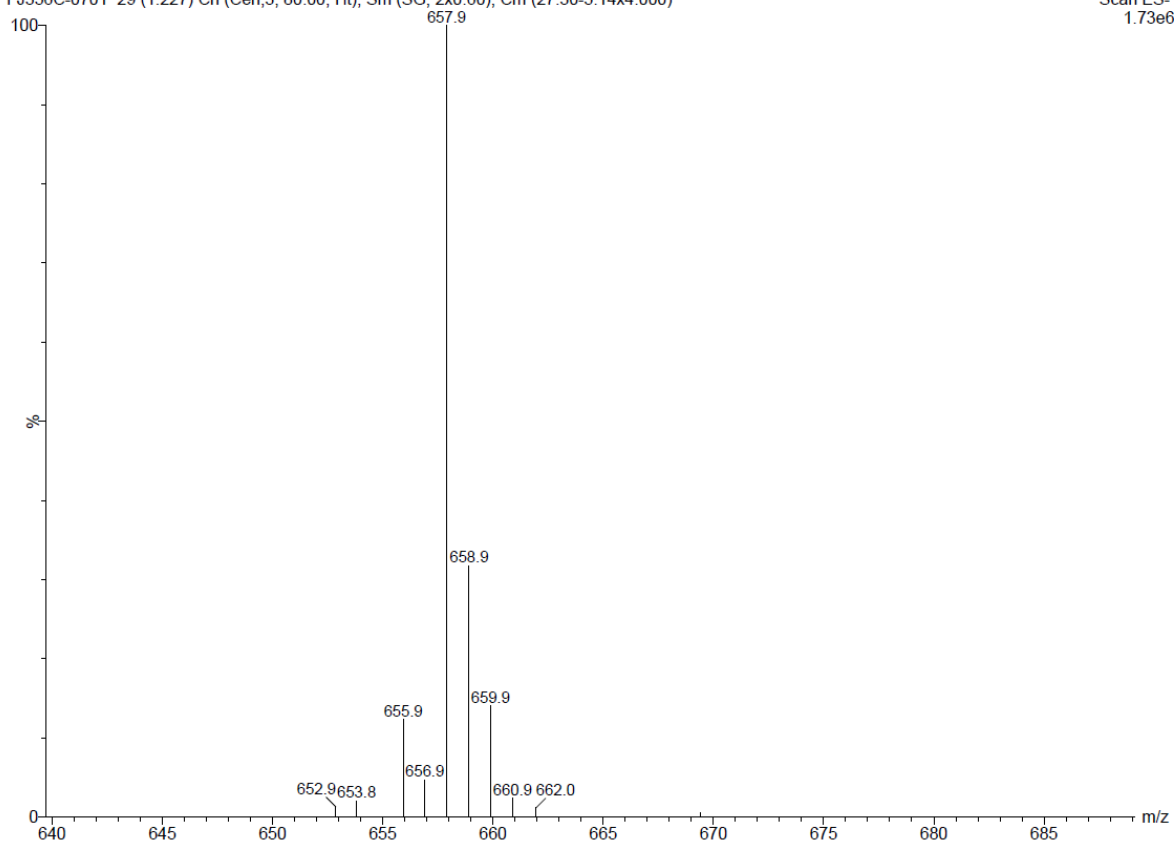

**Figure S38.** ESI-MS spectrum of  $\text{Et}_4\text{N}[\text{Fe}_2[(\text{SCH}_2)_2\text{NCH}_2\text{CN}](\text{CN})(\text{CO})_4\text{PPh}_3]$  ( $\text{Et}_4\text{N}[\mathbf{5}]$ ) in  $\text{CH}_2\text{Cl}_2$  solution.

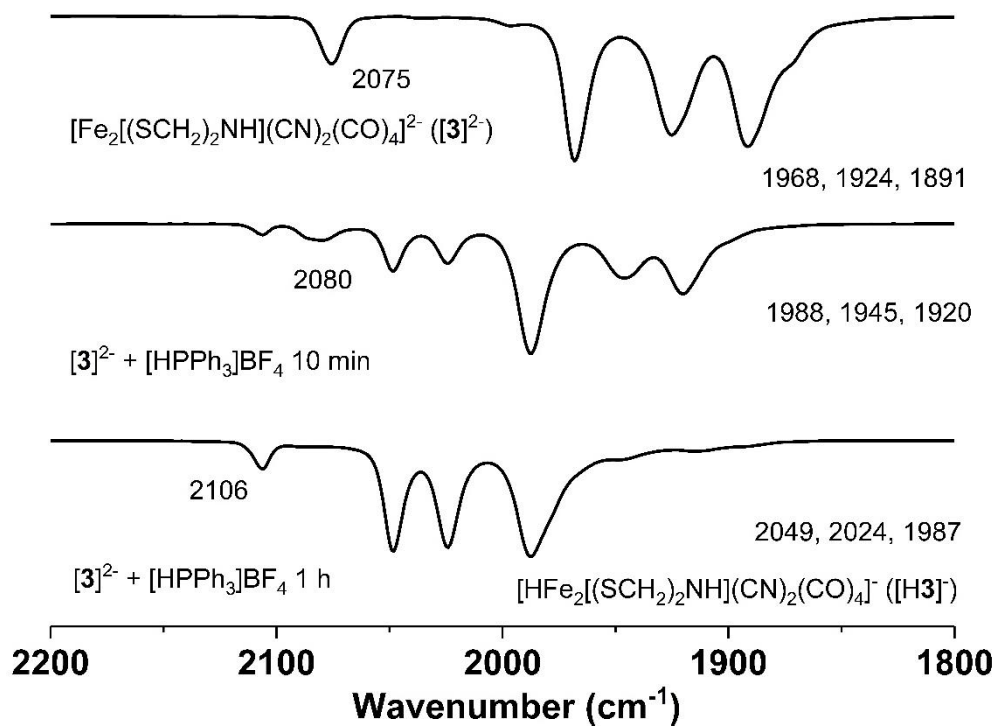

**Figure S39.** IR spectra of  $(\text{Et}_4\text{N})_2[\text{Fe}_2((\text{SCH}_2)_2\text{NH})(\text{CN})_2(\text{CO})_4]$  ( $(\text{Et}_4\text{N})_2[\mathbf{3}]$ ) +  $[\text{HPPH}_3]\text{BF}_4$  in  $\text{CH}_3\text{CN}$  solution.

S43

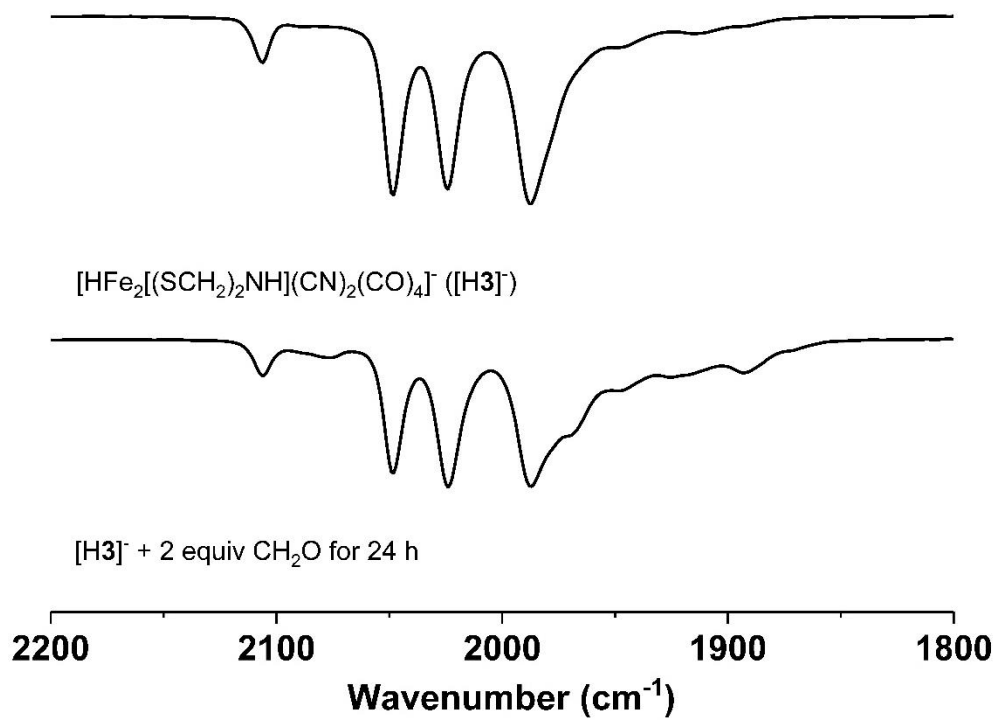

**Figure S40.** IR spectra of (Et<sub>4</sub>N)[HFe<sub>2</sub>[(SCH<sub>2</sub>)<sub>2</sub>NH](CN)<sub>2</sub>(CO)<sub>4</sub>] ((Et<sub>4</sub>N)[H3]) + 2 equiv CH<sub>2</sub>O in CH<sub>3</sub>CN solution.

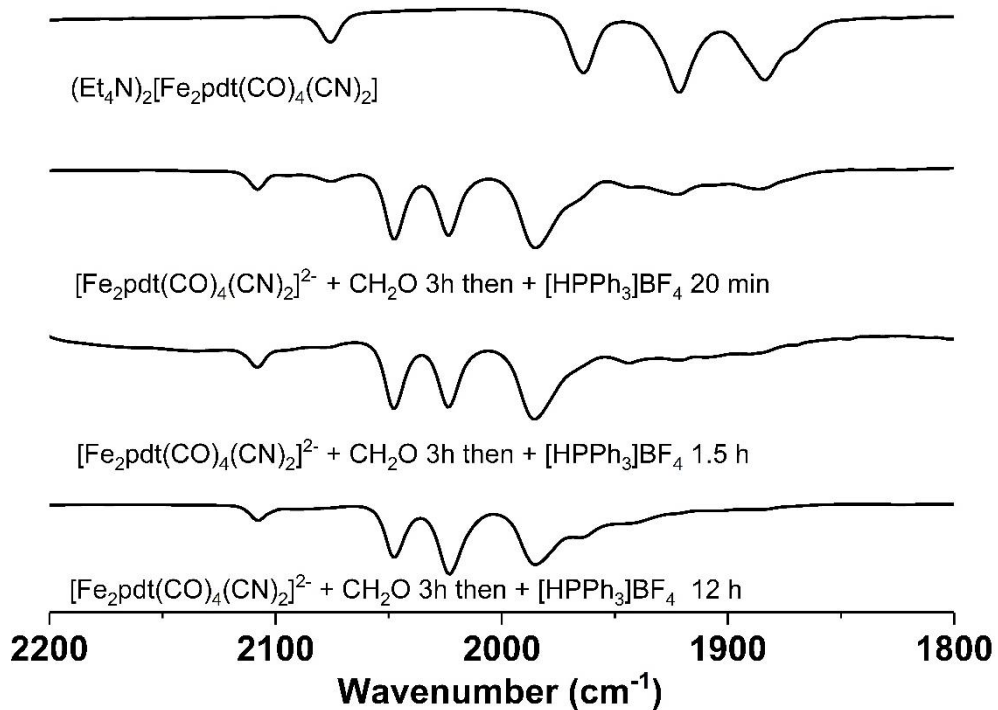

**Figure S41.** IR spectra for the reaction of (Et<sub>4</sub>N)<sub>2</sub>[Fe<sub>2</sub>(pdt)(CN)<sub>2</sub>(CO)<sub>4</sub>] with CH<sub>2</sub>O and [HPPH<sub>3</sub>]BF<sub>4</sub> in CH<sub>3</sub>CN solution.

S45

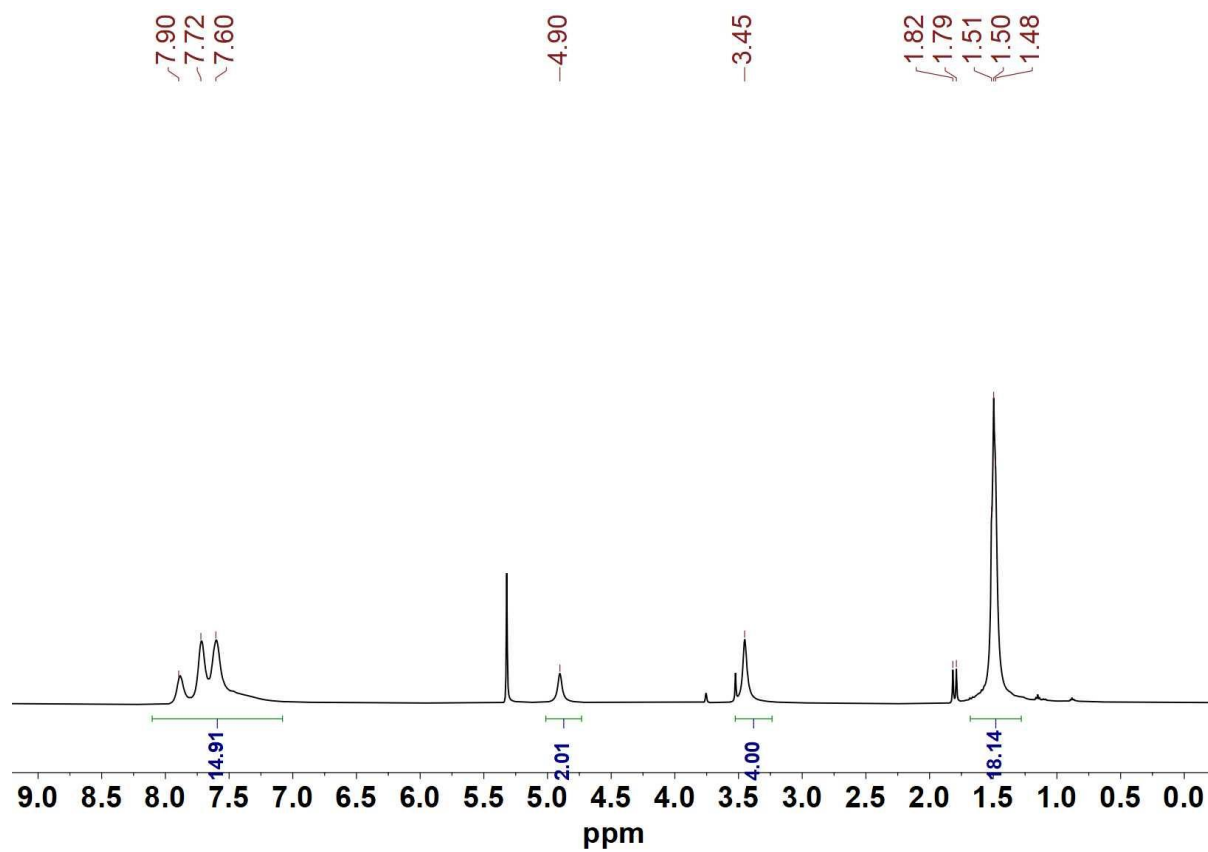

**Figure S42.**  $^1\text{H}$  NMR spectrum of  $[\text{Fe}_2((\text{SCH}_2)_2\text{NCH}_2\text{PPh}_3)(\text{CO})_4(\text{PMe}_3)_2]\text{BF}_4$  (**[6]** $\text{BF}_4$ ) in  $\text{CD}_2\text{Cl}_2$  at room temperature.

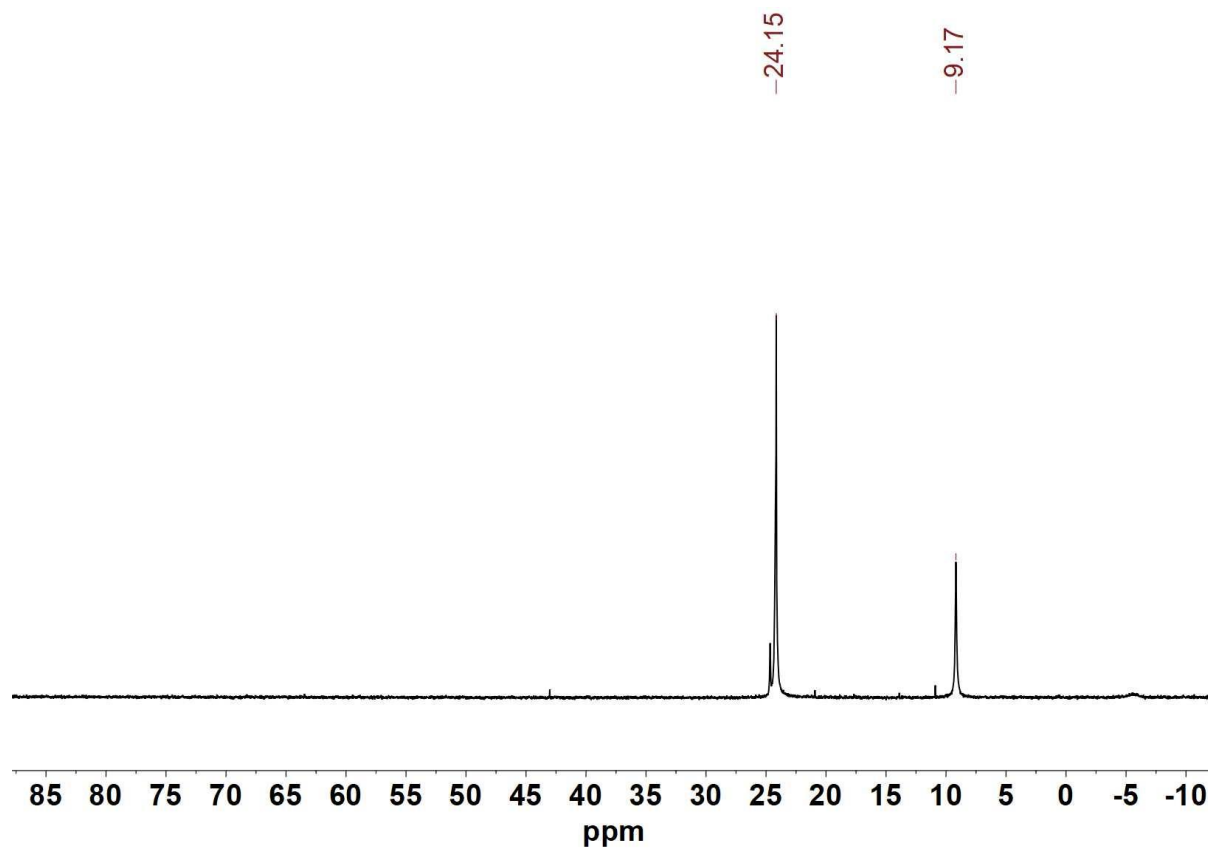

**Figure S43.**  $^{31}\text{P}$  NMR spectrum of  $[\text{Fe}_2((\text{SCH}_2)_2\text{NCH}_2\text{PPh}_3)(\text{CO})_4(\text{PMe}_3)_2]\text{BF}_4$  (**[6]** $\text{BF}_4$ ) in  $\text{CD}_2\text{Cl}_2$  at room temperature.

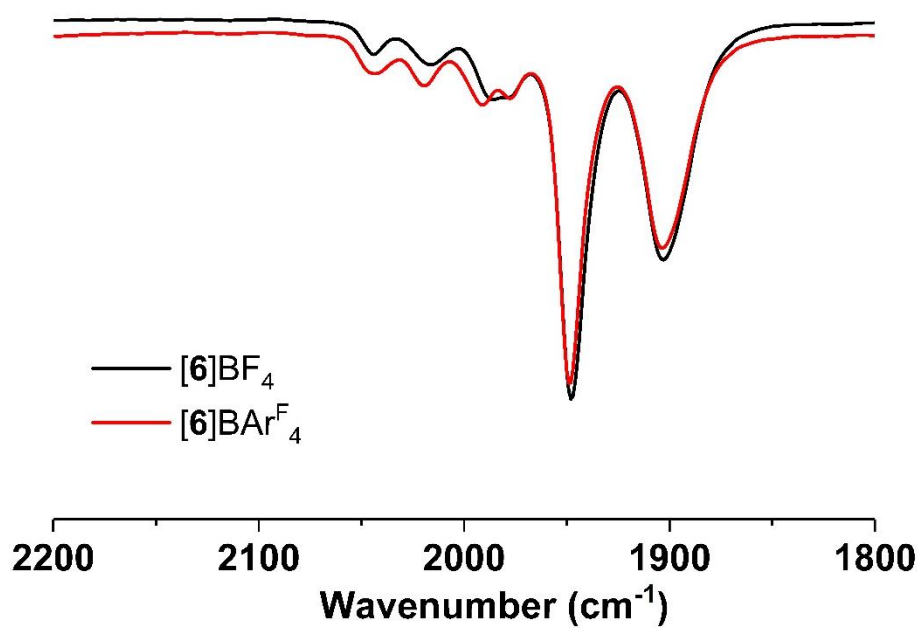

**Figure S44.** IR spectra of  $[\text{Fe}_2[(\text{SCH}_2)_2\text{NCH}_2\text{PPh}_3](\text{CO})_4(\text{PMe}_3)_2]\text{BF}_4$  ( $[\mathbf{6}]\text{BF}_4$ ) and  $[\mathbf{6}]\text{BAr}^{\text{F}}_4$  in  $\text{CH}_2\text{Cl}_2$  solution.

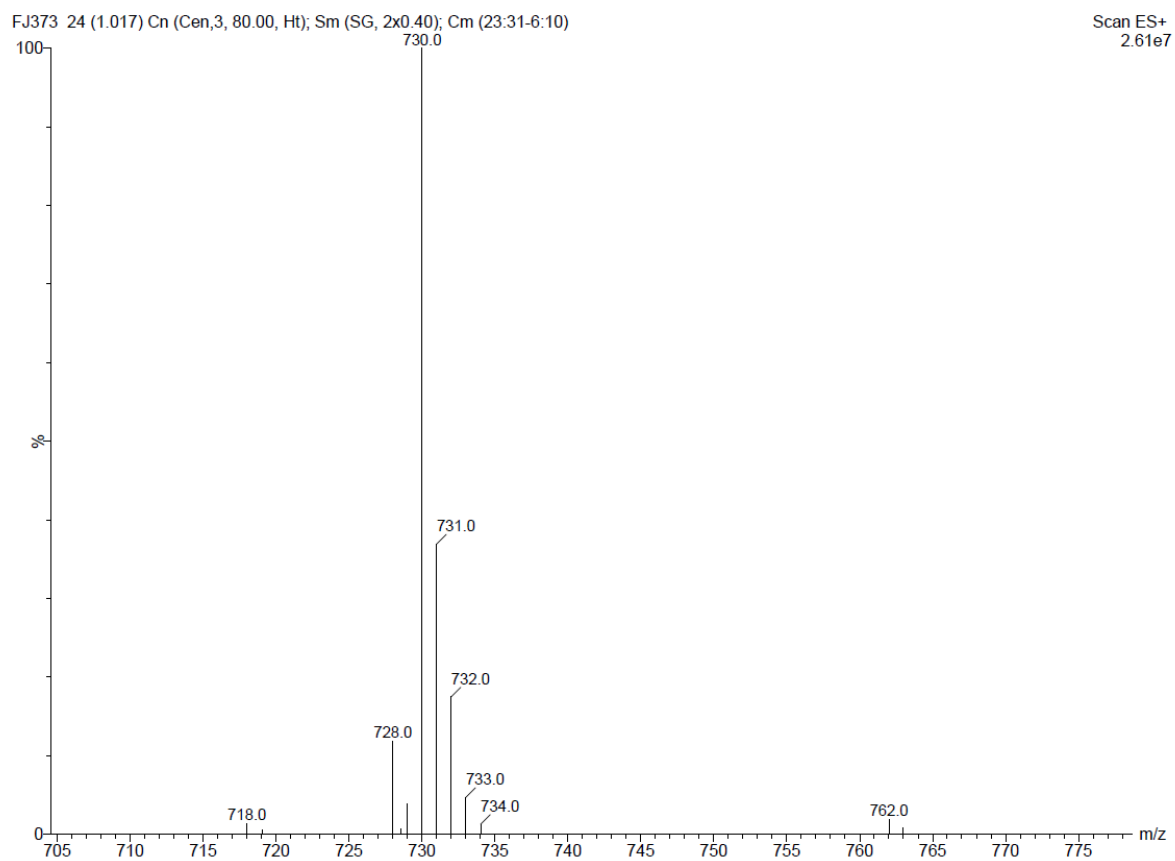

**Figure S45.** ESI-MS spectrum of  $[\text{Fe}_2[(\text{SCH}_2)_2\text{NCH}_2\text{PPh}_3](\text{CO})_4(\text{PMe}_3)_2]\text{BF}_4$  (**[6]BF<sub>4</sub>**) in  $\text{CH}_2\text{Cl}_2$  solution.



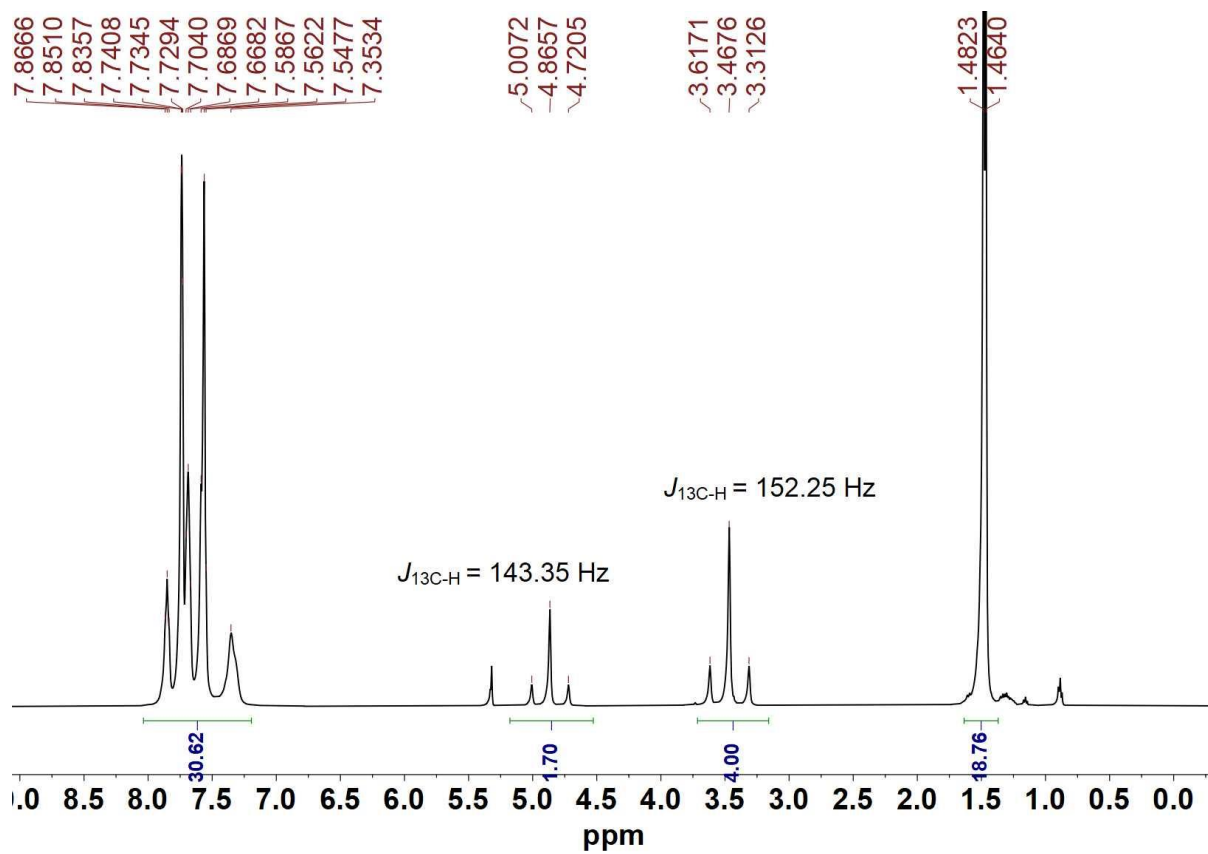

**Figure S46.**  $^1\text{H}$  NMR spectrum of  $^{13}\text{C}$  labeled  $[\text{Fe}_2[(\text{SCH}_2)_2\text{NCH}_2\text{PPh}_3](\text{CO})_4(\text{PMe}_3)_2]\text{BARF}_4$  (**[6]** $\text{BARF}_4$ ) in  $\text{CD}_2\text{Cl}_2$  at room temperature.

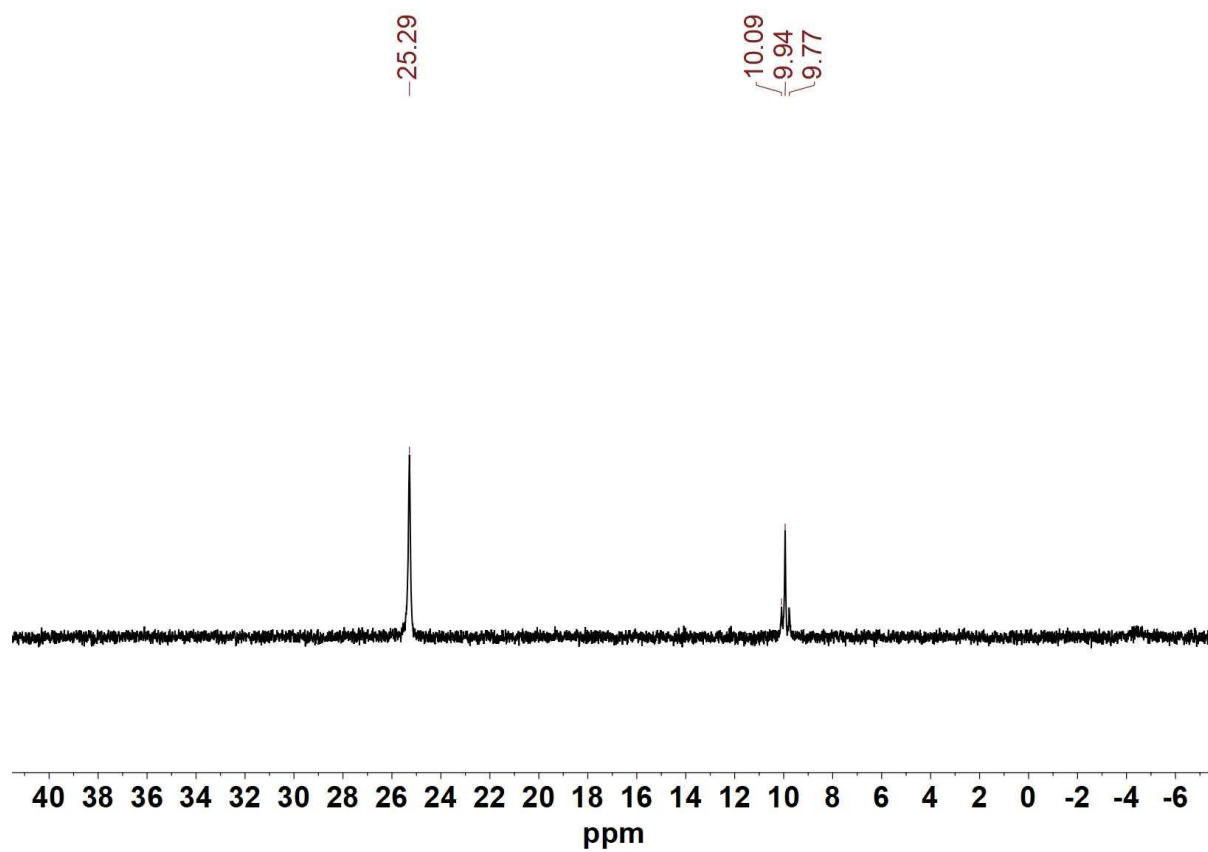

**Figure S47.**  $^{31}\text{P}$  NMR spectrum of  $^{13}\text{C}$  labeled  $[\text{Fe}_2[(\text{SCH}_2)_2\text{NCH}_2\text{PPh}_3](\text{CO})_4(\text{PMe}_3)_2]\text{BARF}_4$  (**[6]** $\text{BARF}_4$ ) in  $\text{CD}_2\text{Cl}_2$  at room temperature.

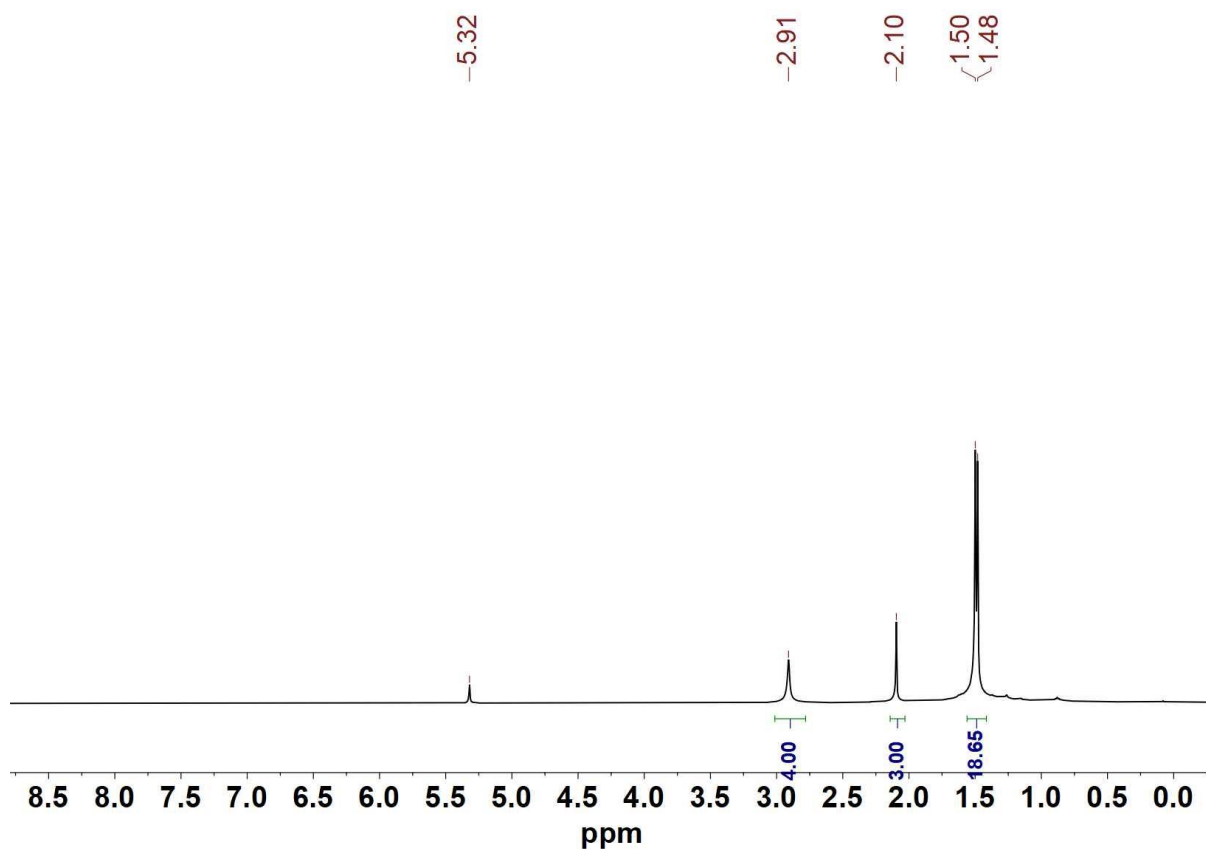

**Figure S48.**  $^1\text{H}$  NMR spectrum of  $\text{Fe}_2[(\text{SCH}_2)_2\text{NMe}](\text{CO})_4(\text{PMe}_3)_2$  in  $\text{CD}_2\text{Cl}_2$  at room temperature.

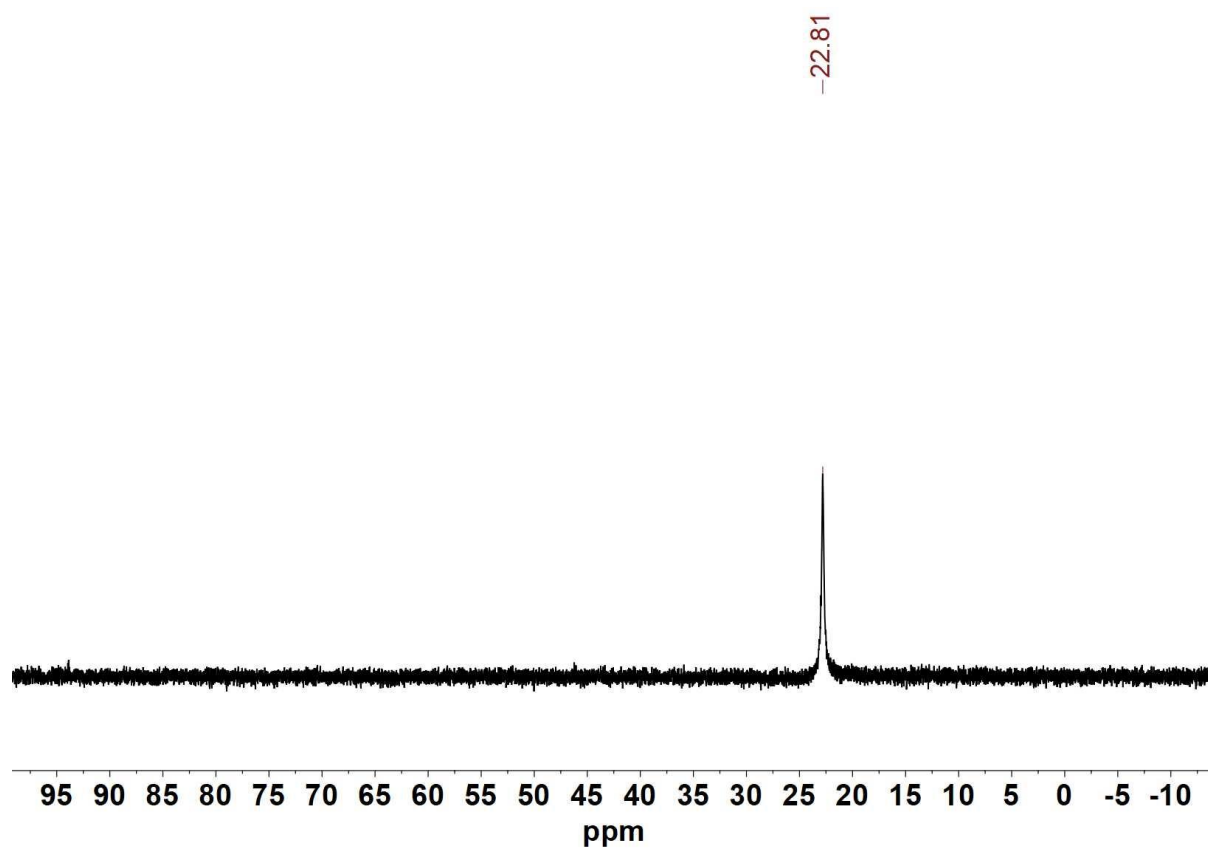

**Figure S49.**  $^{31}\text{P}$  NMR spectrum of  $\text{Fe}_2[(\text{SCH}_2)_2\text{NMe}](\text{CO})_4(\text{PMe}_3)_2$  in  $\text{CD}_2\text{Cl}_2$  at room temperature.

S53

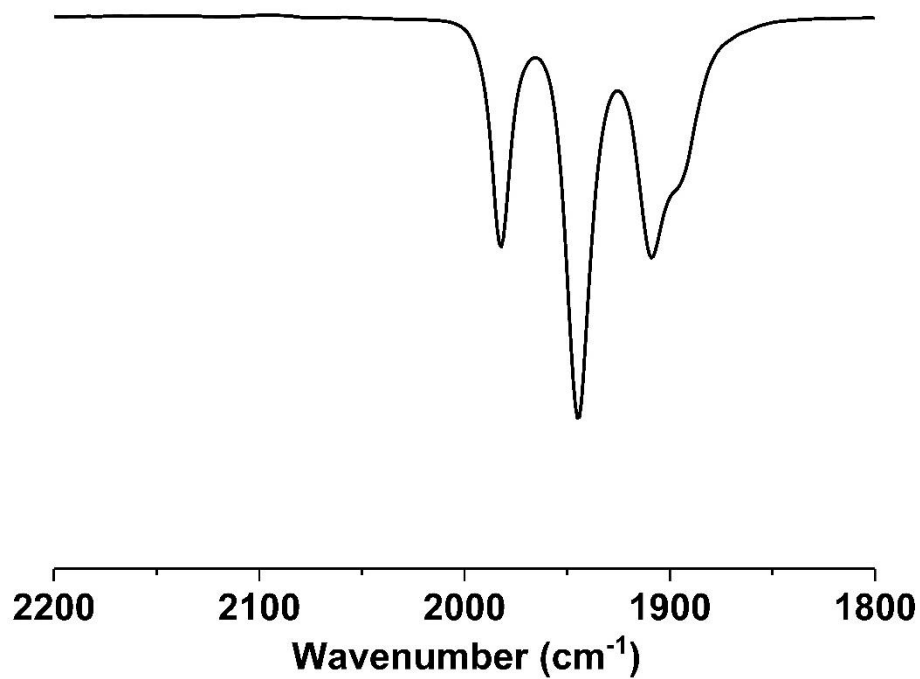

**Figure S50.** IR spectrum of  $\text{Fe}_2[(\text{SCH}_2)_2\text{NMe}](\text{CO})_4(\text{PMe}_3)_2$  in  $\text{CH}_2\text{Cl}_2$  solution.

# S54

SL\_NSULFATE-2 340 (14.300) Cn (Cen,3, 80.00, Ht); Sm (SG, 2x0.40); Cm (306:366-115:181)

Scan ES+  
7.31e7

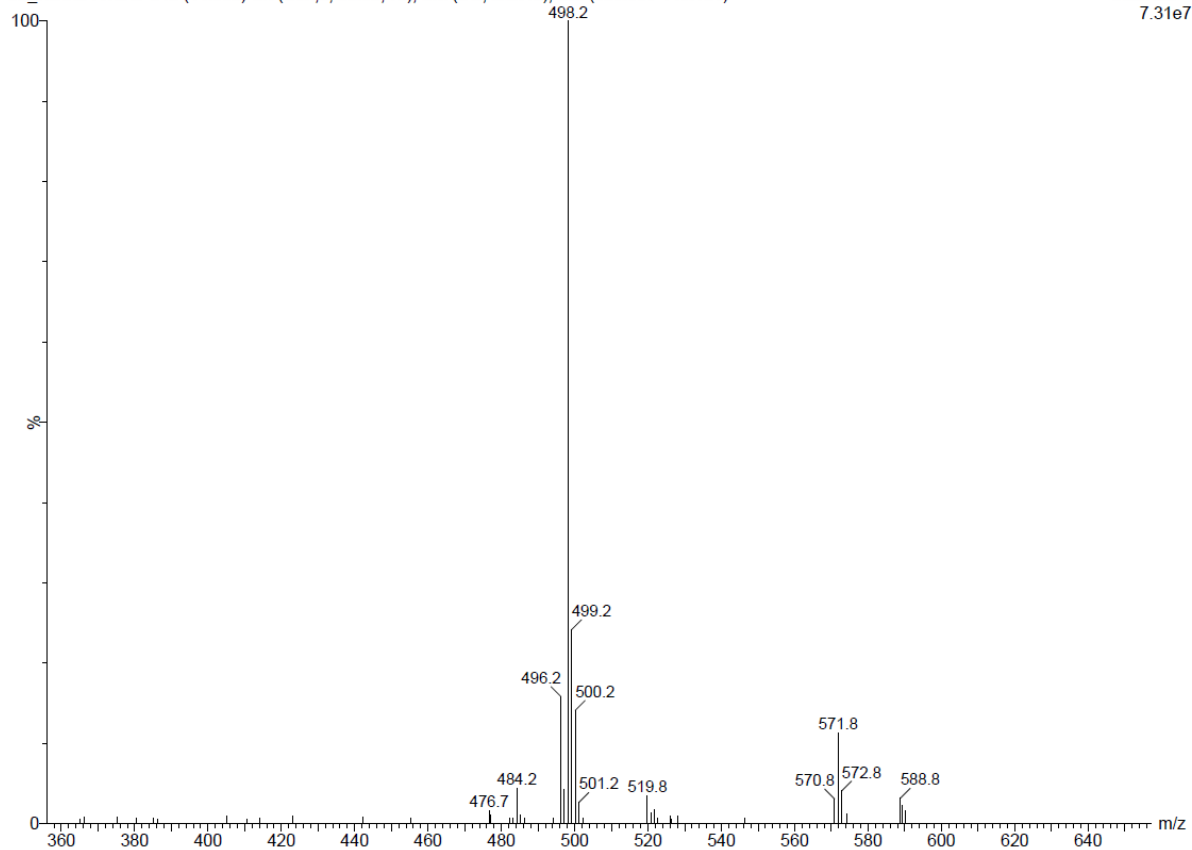

**Figure S51.** ESI-MS spectrum of  $\text{Fe}_2[(\text{SCH}_2)_2\text{NMe}](\text{CO})_4(\text{PMe}_3)_2$  in  $\text{CH}_2\text{Cl}_2$  solution.

**Table S1.** Crystal Data and Structure Refinements.

|                                    |                                                                                                                     |                                                                                                                                             |
|------------------------------------|---------------------------------------------------------------------------------------------------------------------|---------------------------------------------------------------------------------------------------------------------------------------------|
| Identification code                | ed79ks ([2]BARF <sub>4</sub> )                                                                                      | ed04Ls ([1H]BF <sub>4</sub> )                                                                                                               |
| Empirical formula                  | C <sub>45</sub> H <sub>36</sub> B F <sub>24</sub> Fe <sub>2</sub> N O <sub>4</sub> P <sub>2</sub><br>S <sub>2</sub> | C <sub>12.67</sub> H <sub>25.33</sub> B Cl <sub>1.33</sub> F <sub>4</sub><br>Fe <sub>2</sub> N O <sub>4</sub> P <sub>2</sub> S <sub>2</sub> |
| Formula weight                     | 1359.32                                                                                                             | 627.51                                                                                                                                      |
| Temperature                        | 100(2) K                                                                                                            | 100(2) K                                                                                                                                    |
| Wavelength                         | 0.71073 Å                                                                                                           | 0.71073 Å                                                                                                                                   |
| Crystal system                     | Triclinic                                                                                                           | Triclinic                                                                                                                                   |
| Space group                        | P-1                                                                                                                 | P-1                                                                                                                                         |
| Unit cell dimensions               | a = 13.5275(3) Å<br>b = 14.3475(4) Å<br>c = 16.5656(4) Å                                                            | a = 14.0486(2) Å<br>b = 16.9932(3) Å<br>c = 17.3960(3) Å                                                                                    |
| Volume                             | 2661.82(11) Å <sup>3</sup>                                                                                          | 3759.01(11) Å <sup>3</sup>                                                                                                                  |
| Z                                  | 2                                                                                                                   | 6                                                                                                                                           |
| Density (calculated)               | 1.696 Mg/m <sup>3</sup>                                                                                             | 1.663 Mg/m <sup>3</sup>                                                                                                                     |
| Absorption coefficient             | 0.811 mm <sup>-1</sup>                                                                                              | 1.643 mm <sup>-1</sup>                                                                                                                      |
| F(000)                             | 1360                                                                                                                | 1908                                                                                                                                        |
| Crystal size                       | 0.228 x 0.184 x 0.064 mm <sup>3</sup>                                                                               | 0.191 x 0.153 x 0.107 mm <sup>3</sup>                                                                                                       |
| Theta range for data collection    | 2.290 to 28.301°.                                                                                                   | 2.149 to 28.307°.                                                                                                                           |
| Index ranges                       | -18<=h<=18, -19<=k<=19<br>-22<=l<=22                                                                                | -18<=h<=18, -22<=k<=22<br>-23<=l<=23                                                                                                        |
| Reflections collected              | 190539                                                                                                              | 222825                                                                                                                                      |
| Independent reflections            | 13211 [R(int) = 0.0312]                                                                                             | 18706 [R(int) = 0.0328]                                                                                                                     |
| Completeness to theta =<br>25.242° | 99.9 %                                                                                                              | 99.9 %                                                                                                                                      |
| Absorption correction              | Semi-empirical from<br>equivalents                                                                                  | Semi-empirical from<br>equivalents                                                                                                          |
| Max. and min. transmission         | 0.7457 and 0.7147                                                                                                   | 0.7457 and 0.7016                                                                                                                           |
| Refinement method                  | Full-matrix least-squares on F <sup>2</sup>                                                                         | Full-matrix least-squares on F <sup>2</sup>                                                                                                 |
| Data / restraints / parameters     | 13211 / 52 / 743                                                                                                    | 18706 / 548 / 995                                                                                                                           |
| Goodness-of-fit on F <sup>2</sup>  | 1.023                                                                                                               | 1.050                                                                                                                                       |
| Final R indices [I>2sigma(I)]      | R1 = 0.0348, wR2 = 0.0840                                                                                           | R1 = 0.0213, wR2 = 0.0512                                                                                                                   |
| R indices (all data)               | R1 = 0.0369, wR2 = 0.0856                                                                                           | R1 = 0.0241, wR2 = 0.0527                                                                                                                   |
| Extinction coefficient             | n/a                                                                                                                 | n/a                                                                                                                                         |
| Largest diff. peak and hole        | 1.246 and -0.990 e.Å <sup>-3</sup>                                                                                  | 0.970 and -0.765 e.Å <sup>-3</sup>                                                                                                          |

**Table S2.** Crystal Data and Structure Refinements.

| Identification code                | ed82Ls (Et <sub>4</sub> N[5])                                                                  | ed15Ls ([6]BF <sub>4</sub> )                                                                                                                   |
|------------------------------------|------------------------------------------------------------------------------------------------|------------------------------------------------------------------------------------------------------------------------------------------------|
| Empirical formula                  | C <sub>35</sub> H <sub>41</sub> Fe <sub>2</sub> N <sub>4</sub> O <sub>4</sub> P S <sub>2</sub> | C <sub>34.79</sub> H <sub>48.44</sub> B Cl <sub>0.14</sub> F <sub>4</sub><br>Fe <sub>2</sub> N O <sub>4.93</sub> P <sub>3</sub> S <sub>2</sub> |
| Formula weight                     | 788.51                                                                                         | 920.04                                                                                                                                         |
| Temperature                        | 120(2) K                                                                                       | 100(2) K                                                                                                                                       |
| Wavelength                         | 0.71073 Å                                                                                      | 0.71073 Å                                                                                                                                      |
| Crystal system                     | Monoclinic                                                                                     | Monoclinic                                                                                                                                     |
| Space group                        | P2 <sub>1</sub> /c                                                                             | P2 <sub>1</sub> /c                                                                                                                             |
| Unit cell dimensions               | a = 16.8201(7) Å<br>b = 17.3607(7) Å<br>c = 13.5621(6) Å                                       | a = 13.5415(3) Å<br>b = 17.0231(4) Å<br>c = 18.4766(4) Å                                                                                       |
| Volume                             | 3719.3(3) Å <sup>3</sup>                                                                       | 4173.68(16) Å <sup>3</sup>                                                                                                                     |
| Z                                  | 4                                                                                              | 4                                                                                                                                              |
| Density (calculated)               | 1.408 Mg/m <sup>3</sup>                                                                        | 1.464 Mg/m <sup>3</sup>                                                                                                                        |
| Absorption coefficient             | 0.978 mm <sup>-1</sup>                                                                         | 0.977 mm <sup>-1</sup>                                                                                                                         |
| F(000)                             | 1640                                                                                           | 1904                                                                                                                                           |
| Crystal size                       | 0.468 x 0.305 x 0.054 mm <sup>3</sup>                                                          | 0.223 x 0.214 x 0.079 mm <sup>3</sup>                                                                                                          |
| Theta range for data collection    | 1.983 to 26.477°.                                                                              | 2.089 to 27.500°.                                                                                                                              |
| Index ranges                       | -21<=h<=21, -21<=k<=21<br>-16<=l<=16                                                           | -17<=h<=17, -22<=k<=22<br>-23<=l<=23                                                                                                           |
| Reflections collected              | 73436                                                                                          | 60739                                                                                                                                          |
| Independent reflections            | 7636 [R(int) = 0.0605]                                                                         | 9573 [R(int) = 0.0352]                                                                                                                         |
| Completeness to theta =<br>25.242° | 99.9 %                                                                                         | 99.9 %                                                                                                                                         |
| Absorption correction              | Semi-empirical from<br>equivalents                                                             | Semi-empirical from<br>equivalents                                                                                                             |
| Max. and min. transmission         | 0.7454 and 0.5933                                                                              | 0.7456 and 0.7005                                                                                                                              |
| Refinement method                  | Full-matrix least-squares on F <sup>2</sup>                                                    | Full-matrix least-squares on F <sup>2</sup>                                                                                                    |
| Data / restraints / parameters     | 7636 / 332 / 542                                                                               | 9573 / 90 / 511                                                                                                                                |
| Goodness-of-fit on F <sup>2</sup>  | 1.186                                                                                          | 1.103                                                                                                                                          |
| Final R indices [I>2sigma(I)]      | R1 = 0.0600, wR2 = 0.1300                                                                      | R1 = 0.0317, wR2 = 0.0718                                                                                                                      |
| R indices (all data)               | R1 = 0.0690, wR2 = 0.1341                                                                      | R1 = 0.0386, wR2 = 0.0750                                                                                                                      |
| Extinction coefficient             | n/a                                                                                            | n/a                                                                                                                                            |
| Largest diff. peak and hole        | 0.859 and -0.663 e.Å <sup>-3</sup>                                                             | 0.504 and -0.344 e.Å <sup>-3</sup>                                                                                                             |



## Crystallography

### Ed04Ls ([1H]BF<sub>4</sub>) CCDC: 2104104

Intensity data were collected on a Bruker D8 Venture kappa diffractometer equipped with a Photon-II CPAD detector. An Iµs microfocus Mo source ( $\lambda = 0.71073 \text{ \AA}$ ) coupled with a multi-layer mirror monochromator provided the incident beam. The sample was mounted on a 0.3 mm nylon loop with the minimal amount of Paratone-N oil. Data was collected as a series of  $\varphi$  and/or  $\omega$  scans. Data was collected at 100 K using a cold stream of N<sub>2(g)</sub>. The collection, cell refinement, and integration of intensity data was carried out with the APEX3 software.<sup>1</sup> A multi-scan absorption correction was performed with SADABS<sup>2</sup>. The structure was phased with intrinsic phasing methods using SHELXT<sup>3</sup> and refined with the full-matrix least-squares program SHELXL.<sup>4</sup>

A structural model consisting of three target molecules, three BF<sub>4</sub> anions, and two dichloromethane solvent molecules in the asymmetric unit was developed.

Two of the three BF<sub>4</sub> anions were modeled as disordered over two orientations. Within each anion, all 1,2 and 1,3 distances were restrained to be similar (esd 0.01, 0.02 Å). Rigid-bond restraints (esd 0.004) were imposed on displacement parameters for all disordered sites and similar displacement amplitudes (esd 0.005) were imposed on disordered sites overlapping by less than the sum of van der Waals radii. The site occupancy ratios were allowed to freely refine.

Both dichloromethane solvent molecules were modeled as disordered over two orientations. Within each solvent molecule, all 1,2 and 1,3 distances were restrained to be similar (esd 0.01, 0.02 Å). Similar displacement amplitudes (esd 0.005) were imposed on disordered sites overlapping by less than the sum of van der Waals radii. The site occupancy ratios were allowed to freely refine.

H atom treatment - Methyl H atom positions, R-CH<sub>3</sub>, were optimized by rotation about R-C bonds with idealized C-H, R--H and H--H distances. All of the amine H atom positions were located in the difference map; their positions were allowed to freely refine. At convergence, all amine H atoms were in good H-bonding geometries. Remaining H atoms were included as riding idealized contributors. Methyl and amine H atom U's were assigned as 1.5 times U<sub>eq</sub> of the carrier atom; remaining H atom U's were assigned as 1.2 times carrier U<sub>eq</sub>.

The -3 5 0 reflection was omitted from the final refinement due to being partially obscured by the beam stop support in some orientations.

**Ed15Ls** ([6]BF<sub>4</sub>) CCDC: 2104105

Intensity data were collected on a Bruker D8 Venture kappa diffractometer equipped with a Photon-II CPAD detector. An I $\mu$ s microfocus Mo source ( $\lambda = 0.71073 \text{ \AA}$ ) coupled with a multi-layer mirror monochromator provided the incident beam. The sample was mounted on a 0.3 mm nylon loop with the minimal amount of Paratone-N oil. Data was collected as a series of  $\varphi$  and/or  $\omega$  scans. Data was collected at 100 K using a cold stream of N<sub>2(g)</sub>. The collection, cell refinement, and integration of intensity data was carried out with the APEX3 software.<sup>1</sup> A multi-scan absorption correction was performed with SADABS<sup>2</sup>. The structure was phased with intrinsic phasing methods using SHELXT<sup>3</sup> and refined with the full-matrix least-squares program SHELXL.<sup>4</sup>

A structural model consisting of the target molecule, a BF<sub>4</sub> counter ion, and a disordered solvent molecule position in the asymmetric unit was developed.

The solvent molecule position was refined as occupational disorder of diethyl ether and dichloromethane. The dichloromethane occupancy was only approximately seven percent; to maintain a reasonable geometry with such a low occupancy it was refined as an idealized, rigid fragment.<sup>5</sup> Similar displacement amplitudes (esd 0.01) were imposed on disordered sites overlapping by less than the sum of van der Waals radii. The site occupancy ratio was allowed to freely refine.

H atom treatment - Methyl H atom positions, R-CH<sub>3</sub>, were optimized by rotation about R-C bonds with idealized C-H, R--H and H--H distances. Remaining H atoms were included as riding idealized contributors. Methyl H atom U's were assigned as 1.5 times U<sub>eq</sub> of the carrier atom; remaining H atom U's were assigned as 1.2 times carrier U<sub>eq</sub>.

The 1 1 0, 1 0 0, and 0 1 1 reflections were omitted from the final refinement due to being partially obscured by the beam stop in some orientations. The 6 6 12 reflection was omitted from the final refinement due to being partially obscured by the Cu beam stop in some orientations. The -8 1 3 and -9 1 2 reflections both showed large F<sub>o</sub><sup>2</sup> vs. F<sub>c</sub><sup>2</sup> deviations with F<sub>o</sub><sup>2</sup> being larger than F<sub>c</sub><sup>2</sup>. Inspection of individual frame images revealed that in several instances there was a hot pixel on the detector in close enough proximity to the reflection that it may have been included in the integration box. These reflections were omitted from the final refinement.

**Ed79ks** ([2]BArF<sub>4</sub>) CCDC: 2104106

Intensity data were collected on a Bruker D8 Venture kappa diffractometer equipped with a Photon-II CPAD detector. An I $\mu$ s microfocus Mo source ( $\lambda = 0.71073 \text{ \AA}$ ) coupled with a multi-layer mirror monochromator provided the incident beam. The sample was mounted on a 0.3 mm nylon loop with the minimal amount of Paratone-N oil. Data was collected as a series of  $\varphi$  and/or  $\omega$  scans. Data was collected at 100 K using a cold stream of N<sub>2(g)</sub>. The collection, cell refinement, and integration of intensity data was carried out with the APEX3 software.<sup>1</sup> A multi-scan absorption correction was performed with SADABS<sup>2</sup>. The structure was phased with intrinsic phasing methods using SHELXT<sup>3</sup> and refined with the full-matrix least-squares program SHELXL.<sup>4</sup>

A structural model consisting of the target molecule plus one BArF<sub>24</sub> anion in the asymmetric unit was developed.

Two of the CF<sub>3</sub> groups on the BArF<sub>24</sub> anion were modeled as disordered; the C20 group over two orientations and the C29 group over three orientations. Similarity restraints (esd 0.01  $\text{\AA}$ ) were imposed on all disordered C---F bond distances. Within each disordered group, the fluorine displacement parameters were constrained to be the same. The C20 site occupancy ratio was allowed to freely refine. The site occupancies for the three C29 orientations were allowed to freely refine with in the restraint that the total occupancy was 1.000(1).

H atom treatment - Methyl H atom positions, R-CH<sub>3</sub>, were optimized by rotation about R-C bonds with idealized C-H, R--H and H--H distances. Remaining H atoms were included as riding idealized contributors. Methyl H atom U's were assigned as 1.5 times U<sub>eq</sub> of the carrier atom; remaining H atom U's were assigned as 1.2 times carrier U<sub>eq</sub>.

The -1 1 1 reflection was omitted from the final refinement due to being partially obscured by the beam stop in some orientations.

**Ed82Ls** (Et<sub>4</sub>N[5]) CCDC: 2104107

Intensity data were collected on a Bruker D8 Venture kappa diffractometer equipped with a Photon-II CPAD detector. An I $\mu$ s microfocus Mo source ( $\lambda = 0.71073 \text{ \AA}$ ) coupled with a multi-layer mirror monochromator provided the incident beam. The sample was mounted on a 0.3 mm nylon loop with the minimal amount of Paratone-N oil. Data was collected as a series of  $\varphi$  and/or  $\omega$  scans. Data was collected at 120 K using a cold stream of N<sub>2(g)</sub>. The collection, cell refinement, and integration of intensity data was carried out with the APEX3 software.<sup>1</sup> A multi-scan absorption correction was performed with SADABS<sup>2</sup>. The structure was phased with intrinsic phasing methods using SHELXT<sup>3</sup> and refined with the full-matrix least-squares program SHELXL.<sup>4</sup>

A structural model consisting of the target molecule plus one tetraethylammonium cation in the asymmetric unit was developed.

The nitrile substituent on the adt bridge was modeled as disordered over two orientations. Similarity restraints (esd 0.01  $\text{\AA}$ ) were imposed on all chemically equivalent bond distances. To maintain a more linear geometry about the nitrile group for the minor orientation, similarity restraints (esd 0.02  $\text{\AA}$ ) were imposed on the distances between the nitrile nitrogen atoms and the CH<sub>2</sub> H atoms. Similar displacement amplitudes were imposed on disordered sites overlapping by less than the sum of van der Waals radii. The site occupancy ratio was allowed to freely refine.

The tetraethylammonium cation was modeled as disordered over two orientations. All 1,2 and 1,3 distances of the cation were restrained to be similar (esd 0.01, 0.04  $\text{\AA}$ ). Similar displacement amplitudes were imposed on disordered sites overlapping by less than the sum of van der Waals radii. The site occupancy ratio was allowed to freely refine.

H atom treatment - Methyl H atom positions, R-CH<sub>3</sub>, were optimized by rotation about R-C bonds with idealized C-H, R--H and H--H distances. Remaining H atoms were included as riding idealized contributors. Methyl H atom U's were assigned as 1.5 times U<sub>eq</sub> of the carrier atom; remaining H atom U's were assigned as 1.2 times carrier U<sub>eq</sub>.

The -1 1 1 and 0 2 0 reflections were omitted from the final refinement due to being partially obscured by the beam stop in some orientations.

(1) Bruker (2018). APEX3. Bruker AXS, Inc., Madison, Wisconsin, USA.

(2) Krause, L., Herbst-Irmer, R., Sheldrick, G. M. and Stalke, D. *J. Appl. Cryst.*, **2015**, *48*, 3-10.

(3) Sheldrick, G. M. *Acta Cryst.* **2015**, *A71*, 3-8.

(4) Sheldrick, G. M. *Acta Cryst.* **2015**, *C71*, 3-8.

(5) Guzei, I. A. *J. Appl. Cryst.*, **2014**, *47*, 806-809.
